1 Title

2 **PARP1 inhibitors trigger innate immunity via PARP1 trapping-induced DNA damage**  
3 **response**

4

5 Authors

6 Chiho Kim, Xu-dong Wang, and Yonghao Yu\*

7

8 Affiliations

9 Department of Biochemistry, University of Texas Southwestern Medical Center, Dallas, 75390,  
10 TX, USA

11 \*Correspondence: [Yonghao.Yu@UTSouthwestern.edu](mailto:Yonghao.Yu@UTSouthwestern.edu) (Y.Y)

12

13

14

15

16

17

18

19

20

21

22

23

24 Abstract

25 It is being increasingly appreciated that the immunomodulatory functions of PARP inhibitors  
26 (PARPi) underlie their clinical activities in various *BRCA*-mutated tumors. PARPi possess both  
27 PARP1 inhibition and PARP1 trapping activities. The relative contribution of these two  
28 mechanisms toward PARPi-induced innate immune signaling, however, is poorly understood.  
29 We find that the presence of the PARP1 protein with uncompromised DNA-binding activities is  
30 required for PARPi-induced innate immune response. The activation of cGAS-STING signaling  
31 induced by various PARPi closely depends on their PARP1 trapping activities. Finally, we show  
32 that a small molecule PARP1 degrader blocks the enzymatic activity of PARP1 without eliciting  
33 PARP1 trapping or cGAS-STING activation. Our findings thus identify PARP1 trapping as a  
34 major contributor of the immunomodulatory functions of PARPi. Although PARPi-induced  
35 innate immunity is highly desirable in human malignancies, the ability of “non-trapping” PARP1  
36 degraders to avoid the activation of innate immune response could be useful in non-oncological  
37 diseases.

38

39

40

41

42

43

44

45

46

47

48

49

## 50 Introduction

51 Poly-ADP-ribose polymerase 1 (hereafter referred to as PARP1) is an enzyme that is critically  
52 involved in mediating DNA damage response (DDR). Upon sensing the genotoxic stress, PARP1  
53 is recruited to DNA stand breaks and is activated to synthesize negatively charged Poly-ADP-  
54 ribose (PAR) polymers. One of the functions of these PAR chains is to serve as a platform to  
55 recruit the DDR machinery to repair and resolve these DNA breaks (Murthy et al., 2017).  
56 Therapeutics that target PARP1 have been proposed as an attractive strategy to treat human  
57 malignancies. Indeed, cancers with *BRCA1/2* mutations rely on PARP1 for genome integrity, and  
58 they are selectively killed by PARP1 inhibitors (PARPi) via the “synthetic lethality” mechanism  
59 (Lord et al., 2015, Lord and Ashworth, 2017, Farmer et al., 2005). Four PARPi (Olaparib,  
60 Rucaparib, Niraparib, and Talazoparib) have been approved by the FDA to treat *BRCA1/2*-  
61 deficient breast and/or ovarian cancers (Faraoni and Graziani, 2018). In addition, PARPi are  
62 being extensively evaluated in the clinic, either as single agents or in combination with chemo-  
63 and radiation-therapy approaches, for the treatment of many other solid tumors (Rouleau et al.,  
64 2010, Lord and Ashworth, 2017).

65 All FDA-approved PARPi are  $\text{NAD}^+$ -competitive, and it was initially thought that these  
66 agents kill tumors simply by inhibiting the catalytic activity of PARP1. However, recent studies  
67 suggest that the cytotoxicity of PARPi is ascribed, at least in part, to the ability of these  
68 compounds to induce PARP1 trapping (Hopkins et al., 2019, Murai et al., 2012). During DDR,  
69 PARP1 is activated to catalyze the Poly-ADP-ribosylation (PARylation) of many proteins,  
70 including PARP1 itself. PARylation triggers the release of PARP1 from the DNA lesions, owing  
71 to the charge repulsion and steric hinderance introduced by the PAR polymers. PARPi block the  
72 synthesis of PAR chains, which causes PARP1 to be trapped on the chromatin. The trapped  
73 PARP1 triggers further DNA damage, cell cycle arrest, and eventually, cancer cell death (Lord  
74 and Ashworth, 2017). Besides the PARylation-dependent mechanism, several recent studies also  
75 suggest that although the various clinically relevant PARPi all bind to PARP1, they induce  
76 different degrees of PARP1 conformational changes, and in doing so, PARP1 trapping (Lord and  
77 Ashworth, 2017, Hopkins et al., 2019, Murai et al., 2014, Shen et al., 2013, Murai et al., 2012).

78 Many recent studies have provided compelling evidence for a functional link between  
79 tumor DNA damage and the immune system, during the treatment of cancers. During chemo-

80 and radiation-therapy, self-DNA is released, and is detected by the cytosolic DNA sensor, cyclic  
81 GMP-AMP (cGAMP) synthetase (cGAS). cGAS subsequently produces the second messenger  
82 cGAMP. cGAMP binds to Stimulator of Interferon Genes (STING), leading to the recruitment  
83 and activation of Tank-binding kinase I (TBK1). TBK1 phosphorylates a transcription factor  
84 called interferon regulatory factor 3 (IRF3), resulting in its nuclear translocation, and the IRF3-  
85 dependent activation of type I interferon (IFN) signaling (Chen et al., 2016, Ishikawa and Barber,  
86 2008, Li and Chen, 2018, Barber, 2015). Thus, the cGAS-STING pathway plays a vital role not  
87 only in protecting the cells against a variety of pathogens, but also in the antitumor immune  
88 response. Because PARPi treatment is known to produce cytosolic dsDNA (double-stranded  
89 DNA), it has been proposed that the activation of innate immune signaling could be a critical  
90 molecular mechanism underlying the therapeutic effect of PARPi (Ding et al., 2018, Shen et al.,  
91 2019, Pantelidou and Sonzogni, 2019, Sen et al., 2019). However, the relative contribution of the  
92 two independent, yet interconnected mechanisms (i.e., PARP1 inhibition and PARP1 trapping)  
93 in mediating the antitumor immunity of PARPi is not well understood.

94 In this study, we show that PARPi treatment induces the antitumor immune response via  
95 the cGAS-STING pathway. However, PARPi treatment generates cytosolic dsDNA, only in the  
96 presence of the PARP1 protein. PARPi-induced dsDNA is subsequently recognized by cGAS,  
97 which leads to the activation of innate immune signaling. We subsequently employed a series of  
98 clinically relevant PARPi with different PARP1 trapping activities, as well as a “non-trapping”  
99 PARP1 degrader. We showed that the activation of innate immune signaling is critically  
100 dependent on the PARP1 trapping activity of these compounds. These results provide evidence  
101 that PARPi-mediated PARP1 trapping, but not the catalytic inhibition of PARP1, is a key  
102 determinant for the activation of the innate immune response.

103

104 Results

### 105 **PARPi activates innate immune signaling via the cGAS-STING pathway**

106 It is being increasingly appreciated that chemo- and radiation-therapy cause the formation of  
107 cytosolic dsDNA and micronuclei, which, in turn, lead to the activation of the cGAS-STING  
108 signaling pathway and inflammatory responses in tumors (Vanpouille-Box et al., 2018, Liang

109 and Peng, 2016, Harding et al., 2017, Mackenzie et al., 2017, Dou et al., 2017, Glück and Guey,  
110 2017, Vanpouille-Box et al., 2017, Yum et al., 2019). We explored the immunomodulatory  
111 functions of PARPi using Talazoparib, which is an FDA-approved PARP1 inhibitor that is  
112 known to potently inhibit and trap PARP1 (Figure 1A). We found that Talazoparib treatment was  
113 able to induce the formation of cytosolic dsDNA (Figure 1B) as well as  $\gamma$ H2AX (a marker for  
114 DNA double strand breaks) (Figure 1C). To evaluate the innate immune response, we examined  
115 the phosphorylation of TBK1 (pS172 TBK1) and IRF3 (pS396 IRF3), two critical components in  
116 the cGAS-STING pathway. Indeed, Talazoparib treatment dramatically increased both  
117 phosphorylation events (Figure 1D and 1E). Talazoparib treatment also remarkably induced the  
118 nuclear translocation of phospho-IRF3 (Figure 1E, right), which is a critical step for IRF3-  
119 mediated gene transcription. We then examined the mRNA expression level of a number of  
120 known downstream target genes of the cGAS-STING pathway. Consistent with the previous  
121 studies, Talazoparib treatment greatly upregulated the expression of type I interferon (IFN; *Inf- $\alpha$*   
122 and *Inf- $\beta$* ), pro-inflammatory cytokines (*Ccl5* and *Cxcl10*), and interferon-stimulated genes (ISGs;  
123 *Isg15*, *Mx1*, *Mx2*, and *Ifit3*) (Figure 1F and S1A). To examine whether the cGAS-STING  
124 pathway is necessary for the PARPi-induced innate immune signaling, we depleted cGAS using  
125 two independent short hairpin RNAs (shRNAs) (Figure 1G). Knock-down (KD) of cGAS did not  
126 interfere with PARP1 trapping (Figure S1B) or the subsequent DDR (Figure S1C). However, the  
127 activation of the innate immune response, as assessed by the level of pS172 TBK1 and the  
128 cGAS-STING target genes, was dramatically reduced in cGAS-depleted cells (Figure 1H, 1I, and  
129 S1D). Taken together, these results demonstrate that PARPi treatment induces the innate immune  
130 response via the cGAS-STING pathway.

131 To examine the immunomodulatory effects of PARPi in an unbiased manner, we  
132 performed isobaric labeling-based, global protein expression analysis in Talazoparib-treated  
133 MHH-ES-1 cells (an Ewing's sarcoma cell line that is highly sensitive to PARPi) (Gill et al.,  
134 2015). Talazoparib treatment was able to induce potent PARP1 trapping,  $\gamma$ H2AX formation and  
135 TBK1 phosphorylation in this cell line (Figure S1E to S1G). Cells treated with DMSO or  
136 Talazoparib were lysed, and the proteins were digested with the resulting peptides labeled with  
137 the corresponding tandem mass tag (TMT) reagents. From this dataset, we were able to identify  
138 and quantify a total of 9,545 proteins (protein false-discovery rate (FDR) < 1%) (Table S1).  
139 Correlation analysis revealed an excellent reproducibility between the biological replicate

140 samples (Figure S1H). Compared to control, Talazoparib treatment induced a total of 270 and  
141 395 proteins that were up- and down-regulated by at least two-fold, respectively (Figure S1I).  
142 Intriguingly, gene ontology (GO) analyses of the up-regulated proteins showed that these  
143 proteins were highly enriched with biological processes connected to innate immune signaling  
144 (e.g., type I interferon signaling pathway,  $P = 2.79 \times 10^{-5}$  and immune response  $P = 8.04 \times 10^{-5}$ ),  
145 which we validated using independent qRT-PCR assays (Figure S1J and S1K, and Table S2).

146

### 147 **PARP1 trapping is required for the PARPi-induced innate immune signaling**

148 Because all FDA-approved PARPi possess both PARP1 trapping and PARP inhibition activities,  
149 we used a genetic method to assess their relative contribution to PARPi-induced activation of the  
150 cGAS-STING pathway. Specifically, we generated PARP1 knock-out (KO) HeLa cells (Figure  
151 S2A), and found that Talazoparib treatment only induced PARP1 trapping in the wild-type (WT)  
152 cells, but not in PARP1 KO cells (Figure 2A). Accordingly, DDR, as detected by  $\gamma$ H2AX, was  
153 also only elevated in the PARP1 WT cells (Figure 2B). Next we evaluated whether the deletion  
154 of the PARP1 protein affects the PARPi-induced activation of the cGAS-STING pathway. As we  
155 expected, Talazoparib treatment led to a dramatic increase of pS172 TBK1 only in the PARP1  
156 WT cells, but not PARP1 KO cells (Figure 2C). Talazoparib-induced IRF3 phosphorylation and  
157 its nuclear translocation were also blocked by PARP1 deletion (Figure 2D). Finally, PARP1  
158 deletion also greatly diminished Talazoparib-induced expression of cGAS-STING target genes  
159 (Figure 2E and S2B). These data indicate that the PARP1 protein is required for the PARPi-  
160 mediated activation of innate immune signaling.

161 We surveyed a series of clinically relevant PARPi, including Talazoparib, Niraparib,  
162 Rucaparib, Olaparib, and Veliparib. Consistent with previous studies, these compounds all  
163 potently blocked the enzymatic activity of PARP1 (Figure S3A). However, these compounds  
164 were able to induce different levels of PARP1 trapping (PARP1 trapping levels: Talazoparib >  
165 Niraparib > Rucaparib  $\approx$  Olaparib > Veliparib) (Figure 3A). Interestingly, DDR as measured by  
166  $\gamma$ H2AX was correlative with respect to the level of PARP1 trapping elicited by these PARPi  
167 (DNA damage levels: Talazoparib > Niraparib > Rucaparib  $\approx$  Olaparib > Veliparib) (Figure 3B).  
168 Finally, the activation of the cGAS-STING pathway, as measured by the pS172 TBK level, also  
169 correlated with PARP1 trapping (Figure 3C). As an example, compared to Rucaparib,

170 Talazoparib was able to induce a much stronger activation of the cGAS-STING pathway (Figure  
171 S3B). Taken together, these results showed that the level of PARP1 trapping, DNA damage, and  
172 cGAS-STING activation was all positively correlated for the various PARPi (Figure 3D).

173 To further explore the role of PARP1 trapping in mediating the innate immune response  
174 of the PARPi, we employed a PARP1 mutant (R138C) that was identified from a chemical-  
175 induced mutagenesis screen performed in mouse embryonic stem cells (mESCs) (Herzog et al.,  
176 2018). This PARP1 mutant bears a significantly reduced DNA binding capability, and as a result,  
177 it cannot be trapped on the chromatin upon the treatment of PARPi. We generated PARP1 KO  
178 cells, and reconstituted these cells using either WT PARP1 or the PARP1 R138C mutant.  
179 Talazoparib treatment dramatically elevated the levels of PARP1 trapping in WT PARP1-  
180 reconstituted cells, but not in cells reconstituted with the PARP1 R138C mutant (Figure 3E).  
181 Cells expressing the PARP1 R138C mutant also had greatly reduced DDR, upon Talazoparib  
182 treatment (Figure 3F). Finally, the expression of the PARP1 R138C mutant also prevented  
183 Talazoparib-induced activation of the cGAS-STING pathway (Figure 3F, 3G, and S3C). These  
184 results strongly supported the notion that PARP1 trapping is a prerequisite for the PARPi-  
185 induced activation of innate immune signaling.

186

### 187 **PARP1 degraders block PARP1 without eliciting PARP1 trapping or the subsequent innate** 188 **immune signaling**

189 Using the Proteolysis targeting chimera (PROTAC) strategy, we recently developed a series of  
190 small molecule compounds that selectively degrade PARP1 (Wang et al., 2019). These  
191 compounds were derived by linking a PARPi (e.g., Rucaparib) and an E3 binder (e.g.,  
192 pomalidomide) by a covalent chemical linker. Unlike regular PARPi, these compounds block  
193 both the enzymatic and scaffolding effect of PARP1, and thereby could dissect PARP1 inhibition  
194 vs. PARP1 trapping. The treatment of HeLa cells using one such compound (iRucaparib-AP6)  
195 led to robust downregulation of PARP1 in HeLa cells. In contrast, the parent compound  
196 (Rucaparib) only induced the cleavage, but not the degradation of PARP1, presumably because  
197 of its toxicity in these cells (Figure 4A). Consistent with the diminished pool of total PARP1,  
198 iRucaparib-AP6 treatment also resulted in minimal PARP1 trapping and  $\gamma$ H2AX formation  
199 (Figure 4B and 4C). Accordingly, the level of pS172 TBK1 were dramatically increased in

200 Rucaparib-treated, but not in iRucaparib-AP6-treated cells (Figure 4D). We examined the  
201 expression of cGAS-STING target genes in these cells, and found that Rucaparib, but not  
202 iRucaparib-AP6 treatment significantly elevated the mRNA levels of type I IFNs, pro-  
203 inflammatory cytokines and ISGs (Figure 4E).

204

## 205 Discussion

206 Since Rudolf Virchow observed the possible link between the immune system and tumors using  
207 lymphoid cells in a tumor in 1863, to use the immune system promoting antitumor response has  
208 been confirmed as one of the major breakthroughs in oncology, yielding the possibility of long-  
209 term clinical benefit and prolonged survival (Zitvogel et al., 2008, Swann and Smyth, 2007). The  
210 innate immune system as one of antitumor immune responses is composed of molecules and  
211 cells that respond to external and internal danger signals such as pathogen-associated molecular  
212 patterns (PAMPs) and damage-associated molecular patterns (DAMPs). PAMPs and DAMPs  
213 bind to their respective pattern recognition receptors (PRRs) to initiate immune responses. Thus,  
214 cytosolic PRRs including nucleotide-binding oligomerization domain-like receptors, retinoic  
215 acid-inducible gene I-like receptors (RLRs), and cGAS detect intracellular pathogens (Wu and  
216 Chen, 2014). Upon ligand binding, PRRs activate downstream signaling cascades to induce  
217 inflammatory responses such as the innate immune response, providing early protection against  
218 pathogen invasion or cellular damage.

219 Unlike normal cells, cancer cells are often replete with cytosolic dsDNA that originates  
220 from genomic, mitochondrial, and exogenous sources (Vanpouille-Box et al., 2018).  
221 Accumulating data have been reported that acute genomic stressors, including radiation, cisplatin,  
222 and intrinsic DNA damage generate cytosolic dsDNA and micronuclei to activate cGAS-STING  
223 in cancer cells (Ahn et al., 2014, Harding et al., 2017, Mackenzie et al., 2017, Dou et al., 2017).  
224 The role of PARPi as an inducer of DNA damage response has been well established to explain  
225 the cytotoxic effects of these compounds. However, accumulating evidence have pointed out that  
226 coordinated activation of both local and systemic antitumor immune responses could also  
227 underlie the antitumor effects of PARPi (Pantelidou and Sonzogni, 2019, Ding et al., 2018,  
228 Chabanon et al., 2019).



229 Consistent with these previous studies, our data showed that PARPi treatment results in  
230 the robust production of cytosolic dsDNA, which leads to the subsequent activation of cGAS-  
231 STING signaling and the downstream innate immune pathway. The current PARPi are known to  
232 kill tumors via two distinct, but interconnected, mechanisms (i.e., PARP1 inhibition vs. PARP1  
233 trapping). The relative contribution of these two mechanisms in PARPi-mediated innate immune  
234 signaling, however, is poorly understood. Here we sought to address this important question by  
235 using several independent systems. First, we found that the PARP1 protein is required for the  
236 PARPi-induced activation of cGAS-STING signaling. Indeed, Talazoparib was unable to cause  
237 PARP1 trapping, DDR and TBK1 activation in PARP1 KO cells. It is also important to note that  
238 the deletion of PARP1 alone does not lead to TBK1 activation and the expression of  
239 inflammatory genes, suggesting that the blockage of PARP1 catalytic activity is not sufficient to  
240 drive the activation of cGAS-STING signaling. Second, we found that the DNA-binding activity  
241 of PARP1 is required for the PARPi-induced activation of cGAS-STING signaling. Specifically,  
242 we employed a recently described PARP1 mutant (R138C) that was identified from an EMS-  
243 induced random mutagenesis screen for resistance to a PARPi (i.e., Olaparib). This mutant is  
244 defective for DNA binding and PARP1 trapping, and mouse embryonic stem cells (mESCs) that  
245 bear this mutation are resistant to Olaparib. We generated PARP1-deleted cells, and reconstituted  
246 them with either WT PARP1 or the PARP1 R138C mutant. We found that Talazoparib was able  
247 to induce DDR and cGAS-STING signaling only in cells expressing WT PARP1, but not the  
248 PARP1 R138C mutant. Third, we utilized a panel of 5 clinically relevant PARPi (i.e.,  
249 Talazoparib, Niraparib, Rucaparib, Olaparib, and Veliparib) (Lord and Ashworth, 2017). While  
250 these compounds all potently blocked the formation of PAR, they displayed a dramatically  
251 different capability in inducing DDR and innate immune signaling. Intriguingly, activation of  
252 cGAS-STING signaling is closely correlated with the degree of PARP1 trapping elicited by these  
253 compounds. Finally, we utilized that a recently developed, “non-trapping” PARP1 degrader  
254 (iRucaparib-AP6). This compound is cell-membrane permeable, and is able to block the  
255 enzymatic activity of PARP1. However, unlike regular PARPi, iRucaparib-AP6 degrades  
256 PARP1, which prevents PARP1 trapping, DDR and the activation of cGAS-STING signaling.

257 In conclusion, we have identified a direct mechanism of the antitumor immune response  
258 of PARPi. We demonstrated that the ability to induce PARP1 trapping is the primary driver for  
259 the PARPi-mediated activation of innate immune signaling in cancer cells. In the presence of

260 PARP1, PARPi-induced PARP1 trapping generates cytosolic dsDNA, which activates cGAS,  
261 and the downstream innate immune response. Although the immunomodulatory roles of PARPi  
262 are highly desirable in human malignancies, the ability for PARP1 degraders to avoid the  
263 activation of innate immune response could be useful in other contexts (e.g., ischemia-  
264 reperfusion injury and neurodegenerative diseases). The full therapeutic potential of this class of  
265 compounds warrants further studies.

266

267

268

269

270

271

272

273

274

275

276

277

278

279

280

281

282

283

284

285

286

287 Materials and methods

### 288 **Cell lines and culture procedures**

289 Human cervical carcinoma cells (HeLa, from ATCC) were maintained in high glucose  
290 Dulbecco's Modified Eagle's Medium (DMEM) (MilliporeSigma), supplemented with 10%  
291 Fetal bovine serum (FBS) (MilliporeSigma) at 37°C in 5% CO<sub>2</sub>. Human Ewing's Sarcoma cells  
292 (MHH-ES-1, from DSMZ) were maintained in RPMI1640 (MilliporeSigma), supplemented with  
293 10% Fetal bovine serum (FBS) (MilliporeSigma) at 37°C in 5% CO<sub>2</sub>. All cell lines were found to  
294 be mycoplasma-free using the e-Myco kit (Boca Scientific). The concentrations and times of  
295 each chemical treatment are indicated in the figure legends.

296

### 297 **Antibodies and reagents**

298 Antibodies against the following proteins were used (See also supplementary file 3). Cell  
299 Signaling Technology: PARP1 (#9542),  $\gamma$ H2AX (#9718), Histone H3 (#4499), Phospho-  
300 TBK1/NAK (pS172 TBK1; #5483), TBK1/NAK (#3504), cGAS (#15102), STING (#13647),  
301 Phospho-IRF-3 (pS396 IRF3; #4947); Santa Cruz Biotechnology: GAPDH (#sc-32233);  
302 Trevigen: PAR (#4335-MC-100); MilliporeSigma: Flag (#F7425). Thermo Fisher: Alexa Fluor  
303 488-conjugated goat anti-rabbit IgG (Cat# A32731). The following reagents were used:  
304 Talazoparib, Niraparib, Rucaparib, Olaparib, and Veliparib were all purchased from Selleck;  
305 iRucaparib-AP6 was synthesized in previous our report (Wang et al., 2019). Dimethyl sulfoxide  
306 (DMS), and Lipofectamine 2000 were all purchased from Thermo Fisher Scientific; Polybrene  
307 (Hexadimethrine bromide) and Puromycin were purchased from MilliporeSigma.

308

### 309 **Immunoblot analysis**

310 Cellular lysates were prepared using a 1% SDS lysis buffer containing 10 mM HEPES, pH 7.0, 2  
311 mM MgCl<sub>2</sub>, 20 U/mL universal nuclease. Cellular lysates were clarified by centrifugation at  
312 14,000 × g at 4°C for 15 min. Protein concentrations were determined with the BCA assay  
313 (Thermo Fisher Scientific). The resulting supernatants were subjected to immunoblot analysis

314 with the corresponding antibodies. Enhanced chemiluminescence was used to detect specific  
315 bands using standard methods as previously described (Kim et al., 2016). The relative band  
316 intensity was measured using the Image J imaging software.

317

### 318 **Immunofluorescence**

319 For immunofluorescence localization of the target molecules, HeLa PARP1 WT and KO cells  
320 were cultured on the cover glasses. Cells were fixed with 4% paraformaldehyde (Electron  
321 Microscopy Sciences, Hatfield, PA, USA) and blocked for 1 h at RT in PBS (Lonza, Basel,  
322 Switzerland) containing 5% FBS and 0.2% Triton X-100. Cells were then incubated with a  
323 Rabbit monoclonal anti-pS396 IRF3 antibody overnight at 4 °C, followed by incubation with an  
324 Alexa Fluor 488-conjugated goat anti-rabbit IgG (Thermo Fisher). For PicoGreen staining, cells  
325 were incubated with the Quant-iT PicoGreen dsDNA reagent (Thermo Fisher) overnight at 4 °C.  
326 Fluorescence images were observed under an LSM 510 META confocal laser scanning  
327 microscope equipped with epifluorescence and an LSM digital image analyzer (Carl Zeiss, Zana,  
328 Germany). DAPI (Molecular Probes, Eugene, OR, USA) was used as a counter staining probe to  
329 mark the nuclei.

330

### 331 **Cellular fractionation**

332 Cells were biochemically fractionated using a subcellular protein fractionation kit (Thermo  
333 Fisher Scientific, USA) according to the manufacturer's instructions. Briefly, cells were  
334 harvested with trypsin-EDTA, centrifuged at  $500 \times g$  for 5 min and washed with ice-cold PBS.  
335 After adding the CEB buffer to the cell pellet, the tube was incubated at 4°C for 10 min with  
336 gentle mixing. Following centrifugation at  $500 \times g$  for 5 min, the supernatant (the cytoplasmic  
337 extract) was transferred to a clean pre-chilled tube on ice. Next, the MEB buffer was added to the  
338 pellet. The tube was briefly vortexed and was incubated at 4°C for 10 min with gentle mixing.  
339 The tube was then centrifuged at  $3000 \times g$  for 5 min and the supernatant (the membrane extract)  
340 was transferred to a clean pre-chilled tube on ice. An ice-cold NEB buffer was added to the pellet,  
341 and the tube was vortexed using the highest setting for 15 s. Following incubation at 4°C for 30  
342 min with gentle mixing, the tube was centrifuged at  $5000 \times g$  for 5 min and the supernatant (the

343 soluble nuclear extract) was transferred to a clean pre-chilled tube on ice. Lastly, the room  
344 temperature NEB buffer containing Micrococcal Nuclease and  $\text{CaCl}_2$  was added to the pellet.  
345 The tube was vortexed for 15 s and incubated at room temperature for 15 min. After incubation,  
346 the tube was centrifuged at  $16,000 \times g$  for 5 min and the supernatant (the chromatin-bound  
347 nuclear extract) was transferred to a clean pre-chilled tube on ice.

348

### 349 **Plasmids and mutagenesis**

350 Flag-tagged PAPR1 WT (PARP1-Flag; #111575) was purchased from Addgene. The Flag-  
351 tagged PARP1 R138C mutant was generated by the site-directed mutagenesis Kit (Agilent, La  
352 Jolla, CA, USA) according to the manufacturer's instructions. The plasmids were subjected to  
353 DNA sequencing for verification.

354

### 355 **CRISPR/Cas9-mediated PARP1 knockout (KO)**

356 In order to knock out PARP1 via the CRISPR/Cas9 system, sgRNAs of PARP1 were designed  
357 using the CRISPR design website (<http://crispr.mit.edu/>) and were incorporated into the  
358 lentiCRISPR\_v2 plasmid. Cells were then plated in 6-well plates and were transfected with these  
359 plasmids. After 24 h of culture and puromycin selection (1  $\mu\text{g}/\text{ml}$ ), single cells were sorted into  
360 96-well plates. After a 2-week culture period, protein lysates were extracted and PARP1 KO was  
361 confirmed by immunoblot analysis. The sgRNAs were listed (See also supplementary file 4).

362

### 363 **RNA interference and transfection**

364 To produce the lentiviruses, shRNA plasmids were co-transfected into HEK293TD cells along  
365 with packaging ( $\Delta 8.9$ ) and envelope (VSVG) expression plasmids using the Lipofectamine 2000  
366 reagent (Invitrogen) according to the manufacturer's instructions. The next day, the media was  
367 refreshed. After two days, viral supernatants were collected and filtered using a  $0.45\text{-}\mu\text{m}$  filter.  
368 Recipient cells were infected in the presence of a serum-containing medium supplemented with 8  
369  $\mu\text{g}/\text{ml}$  Polybrene. Two days after infection, cells were used for the indicated experiments.  
370 Lipofectamine 2000 reagents were also used to transiently knock-down or over-express the target

371 genes, according to the manufacturer's instructions. Two days after infection or transfection,  
372 the cells were used for the indicated experiments. The knock-down or over-expression of target  
373 genes was validated by immunoblot assays. The following shRNA constructs and over-  
374 expression plasmids were used (See also supplementary file 3 and 4). The cGAS knockdown for  
375 RNA interference was achieved using Mission shRNA-encoding lentivirus directed to human  
376 cGAS mRNA (Sigma; GenBank/EMBL/DDBJ accession no. NM\_138441) as recommended by  
377 the manufacturer's protocols. Briefly, lentiviral vectors (in pLKO.1) containing cGAS shRNA  
378 sequences (shcGAS #1, TRCN0000428336; shcGAS #2, TRCN0000149811) and non-target  
379 shRNA control vector (shScramble, SHC016) were purchased from Sigma.

380

### 381 **Real-time quantitative polymerase chain reaction (RT-qPCR)**

382 The mRNA extraction was performed using the RNeasy Mini Kit (QIAGEN) according to the  
383 manufacturer's instructions. Subsequently, total RNAs were converted into cDNA using the  
384 SuperScript III Reverse Transcriptase (Thermo Fisher Scientific) following the manual for first-  
385 strand cDNA synthesis. qPCR reactions were performed on a CFX384 Touch Real-Time PCR  
386 Detection System using 2X Power SYBR Green PCR Master Mix (Thermo Fisher Scientific).  
387 For each condition, technical triplicates were prepared and the quantitation cycle (C<sub>q</sub>) was  
388 calculated. For normalization, GAPDH levels were used as an internal reference and the relative  
389 expression levels were presented. The primers used in qPCR were listed (See also  
390 Supplementary file 4).

391

### 392 **Sample preparation for mass spectrometry**

393 MHH-ES-1 cells were treated with or without Talazoparib (0.1 or 1  $\mu$ M) for 24 hr. Cells were  
394 lysed with 1% SDS lysis buffer containing 10 mM HEPES, pH 7.0, 2 mM MgCl<sub>2</sub>, 20 U/mL  
395 universal nuclease. Protein concentrations were determined with the BCA assay (Thermo Fisher  
396 Scientific). Samples from two biological replicates were reduced with 3 mM dithiothreitol (DTT)  
397 for 20 min and were alkylated with 25 mM iodoacetamide (IDA) for 30 min at room temperature  
398 (RT) in dark. The detergents were removed by methanol/chloroform precipitation. The proteins  
399 were re-solubilized in 8 M urea and digested by Lys-C at a 1:100 (w/w) enzyme/protein ratio for

400 2 hr, followed by trypsin digestion at a 1:100 (w/w) enzyme/protein ratio overnight at RT in 2 M  
401 urea. The peptides were desalted using Oasis HLB solid-phase extraction (SPE) cartridges  
402 (Waters) (Erickson et al., 2015) and approximately 100 µg of peptides from each sample were re-  
403 suspended in 200 mM HEPES, pH 8.5. The peptides were then labeled with the amine-based  
404 TMT 6-plex reagents (Thermo Fisher) for 1 hr at RT. Hydroxylamine solution was added to  
405 quench the reaction and the labeled peptide samples were combined. The TMT samples were  
406 lyophilized and reconstituted in buffer A (10 mM Ammonium formate, pH 10.0). Samples were  
407 centrifuged at  $10,000 \times g$  for 3 min using spin-X centrifuge tube filters (Thermo Fisher Scientific)  
408 prior to loading onto a ZORBAX 300Extend-C18 HPLC column (Agilent, Narrow Bore RR 2.1  
409 mm x 100 mm, 3.5 µm particle size, 300 Å pore size). Peptides were fractionated by bRPLC  
410 (basic pH reversed phase HPLC) at a 0.2 mL/min flow rate using a gradient from 0% to 70%  
411 buffer B (1% Ammonium formate, pH 10.0 and 90% Acetonitrile). A total of seventeen fractions  
412 were collected, which were lyophilized, desalted, and analyzed by LC-MS/MS experiments.

413

#### 414 **Quantitative proteomic analysis by LC-MS/MS**

415 The TMT samples were analyzed on a Q-Exactive HF Mass Spectrometer (Thermo Fisher  
416 Scientific). MS/MS spectra were searched against a composite database of human protein  
417 sequences (Uniprot) and their reversed complement using the Sequest algorithm (Ver28)  
418 embedded in an in-house-developed software suite (Huttlin et al., 2010). MS1 and MS2 mass  
419 tolerances were set to be 50 ppm and 0.05 Da, respectively. Search parameters allowed for full  
420 tryptic peptides (2 missed cleavage sites) with a static modification of 57.02146 Da on cystine  
421 (Carbamidomethyl), a variable modification of 15.994915 Da on methionine (oxidation), and a  
422 static modification of TMT labels (229.16293 Da) on peptide N-terminus and lysine. Search  
423 results were filtered to include < 1% matches (both peptide and protein level filtering) to the  
424 reverse database by the linear discriminator function using parameters including Xcorr, dCN,  
425 missed cleavage, charge state (exclude 1+ peptides), mass accuracy, peptide length, and fraction  
426 of ions matched to MS/MS spectra. Peptide quantification was performed by using the  
427 CoreQuant algorithm implemented in an in-house-developed software suite (Erickson et al.,  
428 2017). The labeling scheme for the TMT experiments is: 126: DMSO; 127: Talazoparib (0.1  
429 µM); 128: Talazoparib (1 µM), 129: Talazoparib (1 µM); 130: Talazoparib (0.1 µM); 131:

430 DMSO. For TMT quantification, a 0.03 Th window was scanned around the theoretical m/z of  
431 each reporter ion (126: 126.127726; 127: 127.124761; 128: 128.134436; 129: 129.131471; 130:  
432 130.141145; 131: 131.138180) to detect the presence of these ions. The maximum intensity of  
433 each ion was extracted, and the signal-to-noise (SN) value of each protein is calculated by  
434 summing the reporter ion counts across all identified peptides. Because the same amount of  
435 peptides was used for each TMT channel, the total reporter ion intensity of each channel was  
436 summed across all quantified proteins, and was then normalized and reported. Data were  
437 exported to Excel for further analysis.

438

### 439 **Statistics**

440 All statistical analyses including unpaired Student's t-tests, one- and two-way ANOVA tests  
441 were performed using the GraphPad Prism software (v8.2.0). The type of statistical analyses,  
442 parameters, and number of replicates are indicated for each experiment in the figure legends.  
443 Data were calculated as mean  $\pm$  SEM or SD. The following indications of significance were used  
444 throughout the manuscript: \*  $p < 0.05$ , \*\*  $p < 0.01$ , \*\*\*  $p < 0.001$ , \*\*\*\*  $p < 0.0001$ , n.s, not significant.

445

446

447

448

449

450

451

452

453

454

455



456

457

458

#### 459 Acknowledgements

460 We thank Dr. Wang Shuai for the initial help with the preparation of the mass spectrometry  
461 samples. This work was supported, in part, by grants from the NIH (R01GM122932 and  
462 R35GM134883 to Y.Y.) and Welch foundation (I-1800 to Y.Y.).

463

464

#### 465 Additional information

#### 466 Funding

| <b>Funder</b>                                     | <b>Grant reference number</b> | <b>Author</b> |
|---------------------------------------------------|-------------------------------|---------------|
| National Institute of<br>General Medical Sciences | R01GM122932                   | Yonghao Yu    |
| National Institute of<br>General Medical Sciences | R35GM134883                   | Yonghao Yu    |
| Welch Foundation                                  | I-1800                        | Yonghao Yu    |

The funders had no role in study design, data collection and interpretation, or the decision to submit the work for publication

467

#### 468 Author contributions

469 Chiho Kim, Conceptualization, Data curation, Formal analysis, Methodology, Investigation,  
470 Writing – original draft, Writing – review and editing; Xu-dong Wang, Formal analysis;  
471 Yonghao Yu, Conceptualization, Supervision, Funding acquisition, Investigation, Writing –  
472 original draft, Writing – review and editing.

473

#### 474 Author contributions

475 Chiho Kim <https://orcid.org/0000-0001-6846-5515>

476 Xu-dong Wang <https://orcid.org/0000-0002-8265-1485>

477 Yonghao Yu <https://orcid.org/0000-0001-8414-4666>

478

479 Decision letter and Author response

480

481

482 Additional files

483 Supplementary files

- 484 • Supplementary file 1. Raw and analyzed TMT-MS data in MHH-ES-1 following
- 485 Talazoparib treatment (1  $\mu$ M for 24 hrs)
- 486 • Supplementary file 2. GO analysis of up-regulated proteins from Supplementary file 1.
- 487 • Supplementary file 3. Key resources table
- 488 • Supplementary file 4. Oligo sequence in this study
- 489 • Transparent reporting form

490

491 Data availability

492 All data generated or analyzed during this study are included in the manuscript and supporting  
493 files.

494

495

496

497

498

499

500

501

502 References

- 503 AHN, J., XIA, T., KONNO, H., KONNO, K., RUIZ, P. & BARBER, G. N. 2014. Inflammation-driven  
504 carcinogenesis is mediated through STING. *Nat Commun*, 5, 5166.
- 505 BARBER, G. N. 2015. STING: infection, inflammation and cancer. *Nat Rev Immunol*, 15, 760-70.
- 506 CHABANON, R. M., MUIRHEAD, G., KRASTEV, D. B., ADAM, J., MOREL, D., GARRIDO, M., LAMB, A.,  
507 HÉNON, C., DORVAULT, N., ROUANNE, M., MARLOW, R., BAJRAMI, I., CARDEÑOSA, M. L.,  
508 KONDE, A., BESSE, B., ASHWORTH, A., PETTITT, S. J., HAIDER, S., MARABELLE, A., TUTT, A.  
509 N., SORIA, J. C., LORD, C. J. & POSTEL-VINAY, S. 2019. PARP inhibition enhances tumor cell-  
510 intrinsic immunity in ERCC1-deficient non-small cell lung cancer. *J Clin Invest*, 129, 1211-1228.
- 511 CHEN, Q., SUN, L. & CHEN, Z. J. 2016. Regulation and function of the cGAS-STING pathway of cytosolic DNA  
512 sensing. *Nat Immunol*, 17, 1142-9.
- 513 DING, L., KIM, H. J., WANG, Q., KEARNS, M., JIANG, T., OHLSON, C. E., LI, B. B., XIE, S., LIU, J. F.,  
514 STOVER, E. H., HOWITT, B. E., BRONSON, R. T., LAZO, S., ROBERTS, T. M., FREEMAN, G. J.,  
515 KONSTANTINOPOULOS, P. A., MATULONIS, U. A. & ZHAO, J. J. 2018. PARP Inhibition Elicits  
516 STING-Dependent Antitumor Immunity in Brca1-Deficient Ovarian Cancer. *Cell Rep*, 25, 2972-2980.e5.
- 517 DOU, Z., GHOSH, K., VIZIOLI, M. G., ZHU, J., SEN, P., WANGENSTEEN, K. J., SIMITHY, J., LAN, Y., LIN,  
518 Y., ZHOU, Z., CAPELL, B. C., XU, C., XU, M., KIECKHAEFER, J. E., JIANG, T., SHOSKES-  
519 CARMEL, M., TANIM, K., BARBER, G. N., SEYKORA, J. T., MILLAR, S. E., KAESTNER, K. H.,  
520 GARCIA, B. A., ADAMS, P. D. & BERGER, S. L. 2017. Cytoplasmic chromatin triggers inflammation in  
521 senescence and cancer. *Nature*, 550, 402-406.
- 522 ERICKSON, B. K., JEDRYCHOWSKI, M. P., MCALISTER, G. C., EVERLEY, R. A., KUNZ, R. & GYGI, S. P.  
523 2015. Evaluating multiplexed quantitative phosphopeptide analysis on a hybrid quadrupole mass  
524 filter/linear ion trap/orbitrap mass spectrometer. *Anal Chem*, 87, 1241-9.
- 525 ERICKSON, B. K., ROSE, C. M., BRAUN, C. R., ERICKSON, A. R., KNOTT, J., MCALISTER, G. C., WÜHR,  
526 M., PAULO, J. A., EVERLEY, R. A. & GYGI, S. P. 2017. A Strategy to Combine Sample Multiplexing  
527 with Targeted Proteomics Assays for High-Throughput Protein Signature Characterization. *Mol Cell*, 65,  
528 361-370.
- 529 FARAONI, I. & GRAZIANI, G. 2018. Role of BRCA Mutations in Cancer Treatment with Poly(ADP-ribose)  
530 Polymerase (PARP) Inhibitors. 10.
- 531 FARMER, H., MCCABE, N., LORD, C. J., TUTT, A. N., JOHNSON, D. A., RICHARDSON, T. B.,  
532 SANTAROSA, M., DILLON, K. J., HICKSON, I., KNIGHTS, C., MARTIN, N. M., JACKSON, S. P.,  
533 SMITH, G. C. & ASHWORTH, A. 2005. Targeting the DNA repair defect in BRCA mutant cells as a  
534 therapeutic strategy. *Nature*, 434, 917-21.
- 535 GILL, S. J., TRAVERS, J., PSHENICHNAYA, I., KOGERA, F. A., BARTHORPE, S., MIRONENKO, T.,  
536 RICHARDSON, L., BENES, C. H., STRATTON, M. R., MCDERMOTT, U., JACKSON, S. P. &  
537 GARNETT, M. J. 2015. Combinations of PARP Inhibitors with Temozolomide Drive PARP1 Trapping  
538 and Apoptosis in Ewing's Sarcoma. *PLoS One*, 10, e0140988.
- 539 GLÜCK, S. & GUEY, B. 2017. Innate immune sensing of cytosolic chromatin fragments through cGAS promotes  
540 senescence. 19, 1061-1070.
- 541 HARDING, S. M., BENCI, J. L., IRIANTO, J., DISCHER, D. E., MINN, A. J. & GREENBERG, R. A. 2017.  
542 Mitotic progression following DNA damage enables pattern recognition within micronuclei. *Nature*, 548,  
543 466-470.
- 544 HERZOG, M., PUDDU, F., COATES, J., GEISLER, N., FORMENT, J. V. & JACKSON, S. P. 2018. Detection of  
545 functional protein domains by unbiased genome-wide forward genetic screening. *Sci Rep*, 8, 6161.

- 546 HOPKINS, T. A., AINSWORTH, W. B., ELLIS, P. A., DONAWHO, C. K., DIGIAMMARINO, E. L., PANCHAL,  
547 S. C., ABRAHAM, V. C., ALGIRE, M. A., SHI, Y., OLSON, A. M., JOHNSON, E. F., WILSBACHER, J.  
548 L. & MAAG, D. 2019. PARP1 Trapping by PARP Inhibitors Drives Cytotoxicity in Both Cancer Cells and  
549 Healthy Bone Marrow. *Mol Cancer Res*, 17, 409-419.
- 550 HUTTLIN, E. L., JEDRYCHOWSKI, M. P., ELIAS, J. E., GOSWAMI, T., RAD, R., BEAUSOLEIL, S. A.,  
551 VILLÉN, J., HAAS, W., SOWA, M. E. & GYGI, S. P. 2010. A tissue-specific atlas of mouse protein  
552 phosphorylation and expression. *Cell*, 143, 1174-89.
- 553 ISHIKAWA, H. & BARBER, G. N. 2008. STING is an endoplasmic reticulum adaptor that facilitates innate  
554 immune signalling. *Nature*, 455, 674-8.
- 555 KIM, C., YUN, N., LEE, J., YODIM, M. B., JU, C., KIM, W. K., HAN, P. L. & OH, Y. J. 2016. Phosphorylation  
556 of CHIP at Ser20 by Cdk5 promotes tAIF-mediated neuronal death. *Cell Death Differ*, 23, 333-46.
- 557 LI, T. & CHEN, Z. J. 2018. The cGAS-cGAMP-STING pathway connects DNA damage to inflammation,  
558 senescence, and cancer. 215, 1287-1299.
- 559 LIANG, Y. & PENG, H. 2016. STING-cytosolic DNA sensing: the backbone for an effective tumor radiation  
560 therapy. *Ann Transl Med*, 4, 60.
- 561 LORD, C. J. & ASHWORTH, A. 2017. PARP inhibitors: Synthetic lethality in the clinic. 355, 1152-1158.
- 562 LORD, C. J., TUTT, A. N. & ASHWORTH, A. 2015. Synthetic lethality and cancer therapy: lessons learned from  
563 the development of PARP inhibitors. *Annu Rev Med*, 66, 455-70.
- 564 MACKENZIE, K. J., CARROLL, P., MARTIN, C. A., MURINA, O., FLUTEAU, A., SIMPSON, D. J., OLOVA,  
565 N., SUTCLIFFE, H., RAINGER, J. K., LEITCH, A., OSBORN, R. T., WHEELER, A. P., NOWOTNY, M.,  
566 GILBERT, N., CHANDRA, T., REIJNS, M. A. M. & JACKSON, A. P. 2017. cGAS surveillance of  
567 micronuclei links genome instability to innate immunity. *Nature*, 548, 461-465.
- 568 MURAI, J., HUANG, S. Y., DAS, B. B., RENAUD, A., ZHANG, Y., DOROSHOW, J. H., JI, J., TAKEDA, S. &  
569 POMMIER, Y. 2012. Trapping of PARP1 and PARP2 by Clinical PARP Inhibitors. *Cancer Res*, 72, 5588-  
570 99.
- 571 MURAI, J., HUANG, S. Y., RENAUD, A., ZHANG, Y., JI, J., TAKEDA, S., MORRIS, J., TEICHER, B.,  
572 DOROSHOW, J. H. & POMMIER, Y. 2014. Stereospecific PARP trapping by BMN 673 and comparison  
573 with olaparib and rucaparib. *Mol Cancer Ther*, 13, 433-43.
- 574 MURTHY, S. E., DUBIN, A. E. & PATAPOUTIAN, A. 2017. Piezos thrive under pressure: mechanically activated  
575 ion channels in health and disease. *Nat Rev Mol Cell Biol*, 18, 771-783.
- 576 PANTELIDOU, C. & SONZOGNI, O. 2019. PARP Inhibitor Efficacy Depends on CD8(+) T-cell Recruitment via  
577 Intratumoral STING Pathway Activation in BRCA-Deficient Models of Triple-Negative Breast Cancer. 9,  
578 722-737.
- 579 ROULEAU, M., PATEL, A., HENDZEL, M. J., KAUFMANN, S. H. & POIRIER, G. G. 2010. PARP inhibition:  
580 PARP1 and beyond. *Nat Rev Cancer*, 10, 293-301.
- 581 SEN, T., RODRIGUEZ, B. L., CHEN, L., CORTE, C. M. D., MORIKAWA, N., FUJIMOTO, J., CRISTEA, S.,  
582 NGUYEN, T., DIAO, L., LI, L., FAN, Y., YANG, Y., WANG, J., GLISSON, B. S., WISTUBA, II &  
583 SAGE, J. 2019. Targeting DNA Damage Response Promotes Antitumor Immunity through STING-  
584 Mediated T-cell Activation in Small Cell Lung Cancer. 9, 646-661.
- 585 SHEN, J., ZHAO, W., JU, Z., WANG, L., PENG, Y., LABRIE, M., YAP, T. A., MILLS, G. B. & PENG, G. 2019.  
586 PARPi Triggers the STING-Dependent Immune Response and Enhances the Therapeutic Efficacy of  
587 Immune Checkpoint Blockade Independent of BRCAness. *Cancer Res*, 79, 311-319.
- 588 SHEN, Y., REHMAN, F. L., FENG, Y., BOSHUIZEN, J., BAJRAMI, I., ELLIOTT, R., WANG, B., LORD, C. J.,  
589 POST, L. E. & ASHWORTH, A. 2013. BMN 673, a novel and highly potent PARP1/2 inhibitor for the  
590 treatment of human cancers with DNA repair deficiency. *Clin Cancer Res*, 19, 5003-15.
- 591 SWANN, J. B. & SMYTH, M. J. 2007. Immune surveillance of tumors. *J Clin Invest*, 117, 1137-46.
- 592 VANPOUILLE-BOX, C., ALARD, A., ARYANKALAYIL, M. J., SARFRAZ, Y., DIAMOND, J. M. &  
593 SCHNEIDER, R. J. 2017. DNA exonuclease Trex1 regulates radiotherapy-induced tumour  
594 immunogenicity. 8, 15618.
- 595 VANPOUILLE-BOX, C., DEMARIA, S., FORMENTI, S. C. & GALLUZZI, L. 2018. Cytosolic DNA Sensing in  
596 Organismal Tumor Control. *Cancer Cell*, 34, 361-378.
- 597 WANG, S., HAN, L., HAN, J., LI, P., DING, Q., ZHANG, Q. J., LIU, Z. P., CHEN, C. & YU, Y. 2019. Uncoupling  
598 of PARP1 trapping and inhibition using selective PARP1 degradation. 15, 1223-1231.
- 599 WU, J. & CHEN, Z. J. 2014. Innate immune sensing and signaling of cytosolic nucleic acids. *Annu Rev Immunol*, 32,  
600 461-88.

601 YUM, S., LI, M., FRANKEL, A. E. & CHEN, Z. J. 2019. Roles of the cGAS-STING Pathway in Cancer  
602 Immunosurveillance and Immunotherapy. *Annual Review of Cancer Biology*, 3, 323-344.  
603 ZITVOGEL, L., APETOH, L., GHIRINGHELLI, F., ANDRÉ, F., TESNIERE, A. & KROEMER, G. 2008. The  
604 anticancer immune response: indispensable for therapeutic success? *J Clin Invest*, 118, 1991-2001.

605

606

## 607 **Figure legends**

608 Figure 1. PARPi induces the innate immune response via the cGAS-STING pathway.

609 (A) The level of trapped PARP1 in HeLa cells treated with or without Talazoparib (10  $\mu$ M for 72  
610 hrs). Top, chromatin-bound fractions were isolated and were probed using the indicated  
611 antibodies. Histone H3 was used as the loading control. Bottom, the graph shows the  
612 quantification of the level of PARP1 trapping. Values were presented as means  $\pm$  SD from three  
613 biological replicates. Significance was determined with unpaired Student's t-test. \*\*\*  $p < 0.001$ .

614 (B) Staining of cytosolic dsDNA in HeLa cells treated with or without Talazoparib (10  $\mu$ M for  
615 72 hrs). Left, representative image of PicoGreen (green) staining. DAPI (blue) was used to  
616 visualize the nucleus. Scale bars represent 10  $\mu$ m. Right, the graph shows the quantification of  
617 the number of cells with cytosolic dsDNA. Values were presented as means  $\pm$  SEM from three  
618 biological replicates (n = 3 fields,  $\geq 100$  cells counted per condition). Significance was  
619 determined with unpaired Student's t-test. \*\*\*\*  $p < 0.0001$ .

620 (C) The extent of DNA damage in HeLa cells treated with or without Talazoparib (10  $\mu$ M for 72  
621 hrs). Top, whole cell lysates were probed using the indicated antibodies. Bottom, the graph  
622 shows the quantification of  $\gamma$ H2AX levels. Values were presented as means  $\pm$  SD from three  
623 biological replicates. Significance was determined with unpaired Student's t-test. \*\*  $p < 0.01$ .

624 (D) The level of pS172 TBK1 in HeLa cells treated with or without Talazoparib (10  $\mu$ M for 72  
625 hrs). Top, whole cell lysates were probed using the indicated antibodies. Bottom, the graph  
626 shows the quantification of pS172 TBK1 levels. Values were presented as means  $\pm$  SD from  
627 three biological replicates. Significance was determined with unpaired Student's t-test. \*\*  $p < 0.01$ .

628 (E) The level of pS396 IRF3 in HeLa cells treated with or without Talazoparib (10  $\mu$ M for 72  
629 hrs). Left, representative image of pS396 IRF3 levels (green). DAPI (blue) was used to visualize

630 the nucleus. Scale bars represent 20  $\mu\text{m}$ . Right, the graph shows the quantification of the number  
631 of cells stained positive for pS396 IRF3 in nucleus. Values were presented as means  $\pm$  SEM  
632 from three biological replicates ( $n = 3$  fields,  $\geq 100$  cells counted per condition). Significance  
633 was determined with unpaired Student's t-test. \*\*\*  $p < 0.001$ .

634 (F) RT-qPCR of type I interferons levels in HeLa cells treated with or without Talazoparib (10  
635  $\mu\text{M}$  for 72 hrs). Values of *Inf- $\alpha$*  and *Inf- $\beta$*  were presented as means  $\pm$  SEM from three biological  
636 replicates. Significance was determined with unpaired Student's t-test. \*  $p < 0.05$ , \*\*  $p < 0.01$ .

637 (G) Knock-down of cGAS. HeLa cells expressing the control shRNA (shScramble) or shcGAS  
638 (shcGAS #1 or #2) were probed using the indicated antibodies. Right, the graph shows the ratio  
639 of cGAS depletion. Values were presented as means  $\pm$  SD from three biological replicates.  
640 Significance was determined with one-way ANOVA. \*\*\*  $p < 0.001$ .

641 (H) Depletion of cGAS abolishes PARPi-induced activation of innate immune signaling. HeLa  
642 cells expressing shRNA against control (shScramble) or cGAS (shcGAS #1 or #2) were treated  
643 with or without Talazoparib (10  $\mu\text{M}$  for 72 hrs). The cells were lysed and were immunoblotted  
644 using the indicated antibodies. Values were presented as means  $\pm$  SD from three biological  
645 replicates. Significance was determined with two-way ANOVA. \*\*\*\*  $p < 0.0001$ , n.s., not  
646 significant.

647 (I) RT-qPCR analyses of type I interferons. HeLa cells expressing shRNA against control  
648 (shScramble) or cGAS (shcGAS #1 or #2) were treated with or without Talazoparib (10  $\mu\text{M}$  for  
649 72 hrs). Values of *Inf- $\alpha$*  and *Inf- $\beta$*  mRNA levels were presented as means  $\pm$  SEM from three  
650 biological replicates. Significance was determined with unpaired Student's t-test. \*\*\*\*  $p < 0.0001$ ,  
651 n.s., not significant.

652

653

654

655

656

657

658

659

660

661 Figure 1-figure supplement 1

662 (A) RT-qPCR analyses of cGAS-STING target gene expression in HeLa cells treated with or  
663 without Talazoparib (10  $\mu$ M for 72 hrs). Values of cytokines and ISGs mRNA levels were  
664 presented as means  $\pm$  SEM from three biological replicates. Significance was determined with  
665 unpaired Student's t-test. \*  $p < 0.05$ , \*\*  $p < 0.01$ , \*\*\*  $p < 0.001$ , \*\*\*\*  $p < 0.0001$ .

666 (B) The levels of trapped PARP1 in HeLa cells expressing shRNA against control (shScramble)  
667 or cGAS (shcGAS #1 or #2) that were treated with or without Talazoparib (10  $\mu$ M for 72 hrs).  
668 Top, chromatin-bound fractions were isolated and were probed using the indicated antibodies.  
669 Histone H3 was used as the loading control. Bottom, the graph shows the quantification of the  
670 levels of PARP1 trapping. Values were presented as means  $\pm$  SD from three biological replicates.  
671 Significance was determined with two-way ANOVA. \*\*\*  $p < 0.001$ , n.s., not significant.

672 (C) The extent of DNA damage in HeLa cells expressing shRNA against control (shScramble) or  
673 cGAS (shcGAS #1 or #2) that were treated with or without Talazoparib (10  $\mu$ M for 72 hrs). Top,  
674 whole cell lysates were probed using the indicated antibodies. Bottom, the graph shows the  
675 quantification of  $\gamma$ H2AX levels. Values were presented as means  $\pm$  SD from three biological  
676 replicates. Significance was determined with two-way ANOVA. \*\*\*  $p < 0.001$ , n.s., not significant.

677 (D) RT-qPCR analyses of cGAS-STING target gene expression in HeLa cells expressing shRNA  
678 against control (shScramble) or cGAS (shcGAS #1 or #2) that were treated with or without  
679 Talazoparib (10  $\mu$ M for 72 hrs). Values of cytokines and ISGs mRNA levels were presented as  
680 means  $\pm$  SEM from three biological replicates. Significance was determined with two-way  
681 ANOVA. \*\*\*  $p < 0.001$ , \*\*\*\*  $p < 0.0001$ , n.s., not significant.

682 (E) The levels of trapped PARP1 in MHH-ES-1 cells treated with or without Talazoparib (1  $\mu$ M  
683 for 24 hrs). Top, chromatin-bound fractions were isolated and were probed using the indicated  
684 antibodies. Histone H3 was used as the loading control. Bottom, the graph shows the

685 quantification of the level of PARP1 trapping. Values were presented as means  $\pm$  SD from three  
686 biological replicates. Significance was determined with unpaired Student's t-test. \*\*  $p < 0.01$ .

687 (F) The extent of DNA damage in MHH-ES-1 cells treated with or without Talazoparib (1  $\mu$ M  
688 for 24 hrs). Top, whole cell lysates were probed using the indicated antibodies. Bottom, the  
689 graph shows the quantification of  $\gamma$ H2AX levels. Values were presented as means  $\pm$  SD from  
690 three biological replicates. Significance was determined with unpaired Student's t-test. \*\*  $p < 0.01$ .

691 (G) The level of pS172 TBK1 in MHH-ES-1 cells treated with or without Talazoparib (1  $\mu$ M for  
692 24 hrs). Top, whole cell lysates were probed using the indicated antibodies. Bottom, the graph  
693 shows the quantification of pS172 TBK1 levels. Values were presented as means  $\pm$  SD from  
694 three biological replicates. Significance was determined with unpaired Student's t-test. \*\*  $p < 0.01$ .

695 (H) Reproducibility of the TMT experiments. The signal-to-noise (SN) values of the  
696 corresponding TMT channels for each protein was extracted from the two biological replicate  
697 experiments.

698 (I) Quantification of protein expression in MHH-ES-1 cells treated with Talazoparib 1  $\mu$ M for 24  
699 hrs (Table S1). Top, the graph shows the  $\log_2$  value of total protein expression in Talazoparib-  
700 treated vs. DMSO control. Bottom, the heatmap shows quantification reproducibility of the up-  
701 and down-regulated protein. Red: up-regulated proteins; Green: down-regulated proteins.

702 (J) GO analysis of the up-regulated proteins as shown in Figure S1I. The list shows the top 10  
703 enriched biological processes of the up-regulated proteins.

704 (K) RT-qPCR analyses of the cGAS-STING target gene expression in MHH-ES-1 cells treated  
705 with or without Talazoparib (1  $\mu$ M for 24 hrs). Values of type I interferons, cytokines, and ISGs  
706 mRNA levels were presented as means  $\pm$  SEM from three biological replicates. Significance was  
707 determined with unpaired Student's t-test. \*  $p < 0.05$ , \*\*  $p < 0.01$ , \*\*\*  $p < 0.001$ , \*\*\*\*  $p < 0.0001$ .

708

709

710

711



712

713

714

715

716 Figure 2. The PARP1 protein is required for PARPi-induced innate immune signaling.

717 (A) PARPi-induced PARP1 trapping in wild-type (WT) and PARP1 knockout (KO) HeLa cells.

718 Cell were also treated with or without Talazoparib (10  $\mu$ M for 72 hrs). Top, chromatin-bound

719 fractions were isolated and were probed using the indicated antibodies. Histone H3 was used as

720 the loading control. Bottom, the graph shows the quantification of the level of PARP1 trapping.

721 Values were presented as means  $\pm$  SD from three biological replicates. Significance was

722 determined with two-way ANOVA. \*\*\*\*  $p < 0.001$ , n.s., not significant.

723 (B) DDR in WT and PARP1 KO HeLa cells treated with or without Talazoparib (10  $\mu$ M for 72

724 hrs). Top, whole cell lysates were probed using the indicated antibodies. Bottom, the graph

725 shows the quantification of  $\gamma$ H2AX levels. Values were presented as means  $\pm$  SD from three

726 biological replicates. Significance was determined with two-way ANOVA. \*\*\*  $p < 0.001$ , n.s., not

727 significant.

728 (C) The level of pS172 TBK1 in WT and PARP1 KO HeLa cells treated with or without

729 Talazoparib (10  $\mu$ M for 72 hrs). Top, whole cell lysates were probed using the indicated

730 antibodies. Bottom, the graph shows the quantification of pS172 TBK1 levels. Values were

731 presented as means  $\pm$  SD from three biological replicates. Significance was determined with two-

732 way ANOVA. \*\*\*\*  $p < 0.0001$ , n.s., not significant.

733 (D) Staining of pS396 IRF3 levels in WT and PARP1 KO HeLa cells treated with or without

734 Talazoparib (10  $\mu$ M for 72 hrs). Left, a representative image of pS396 IRF3 levels (green). DAPI

735 (blue) was used to visualize the nucleus. Right, the graph shows the quantification of the number

736 of cells stained positive for pS396 IRF3 in the nucleus. Values were presented as means  $\pm$  SEM

737 from three biological replicates. Significance was determined with two-way ANOVA. \*\*\*\*  $p <$

738 0.0001, n.s., not significant.

739 (E) RT-qPCR analyses of type I interferons in WT and PARP1 KO HeLa cells treated with or  
740 without Talazoparib (10  $\mu$ M for 72 hrs). Values of *Inf- $\alpha$*  and *Inf- $\beta$*  mRNA levels were presented  
741 as means  $\pm$  SEM from three biological replicates. Significance was determined with two-way  
742 ANOVA. \*  $p < 0.05$ , \*\*  $p < 0.01$ , n.s., not significant.

743

744

745 Figure 2-figure supplement 1

746 (A) The level of PARP1 in WT and PARP1 KO HeLa cells. Whole cell lysates were probed  
747 using the indicated antibodies. GAPDH used as the loading control.

748 (B) RT-qPCR analyses of cGAS-STING target gene expression in WT and PARP1 KO HeLa  
749 cells that were treated with or without Talazoparib (10  $\mu$ M for 72 hrs). Values of cytokines and  
750 ISGs mRNA levels were presented as means  $\pm$  SEM from three biological replicates.  
751 Significance was determined with two-way ANOVA. \*\*  $p < 0.01$ , \*\*\*  $p < 0.001$ , \*\*\*\*  $p < 0.001$ , n.s.,  
752 not significant.

753

754

755

756

757

758

759

760

761

762

763

764

765

766

767

768

769

770 Figure 3. PARP1 trapping is the major contributor of PARPi-induced innate immune signaling.

771 (A) The level of trapped PARP1 in HeLa cells treated with or without the indicated PARPi (10  
772  $\mu$ M for 72 hrs). Top, chromatin-bound fractions were isolated and were probed using the  
773 indicated antibodies. Histone H3 was used as the loading control. Bottom, the graph shows the  
774 quantification of the level of PARP1 trapping. Values were presented as means  $\pm$  SD from three  
775 biological replicates. Significance was determined with one-way ANOVA. \*  $p < 0.05$ , \*\*\*  $p <$   
776  $0.001$ .

777 (B) The extent of DNA damage in HeLa cells treated with or without the indicated PARPi (10  
778  $\mu$ M for 72 hrs). Top, whole cell lysates were probed using the indicated antibodies. Bottom, the  
779 graph shows the quantification of  $\gamma$ H2AX levels. Values were presented as means  $\pm$  SD from  
780 three biological replicates. Significance was determined with one-way ANOVA. \*\*  $p < 0.01$ , \*\*\*  $p$   
781  $< 0.001$ .

782 (C) The level of pS172 TBK1 in HeLa cells treated with or without the indicated PARPi (10  $\mu$ M  
783 for 72 hrs). Top, whole cell lysates were probed using the indicated antibodies. Bottom, the  
784 graph shows the quantification of pS172 TBK1 levels. Values were presented as means  $\pm$  SD  
785 from three biological replicates. Significance was determined with one-way ANOVA. \*  $p < 0.05$ ,  
786 \*\*\*  $p < 0.001$ .

787 (D) Heatmap of PARP1 trapping, DNA damage, and pS172 TBK1 levels for each PARPi. The  
788 normalized levels of PARP1 trapping (A),  $\gamma$ H2AX (B), and pS172 TBK1 (C) are shown.

789 (E) PARPi does not induce the trapping of a PARP1 mutant with defective DNA binding. Top,  
790 HeLa PARP1 KO cells expressing WT PARP1 or R138C mutant PARP1 (R138C) were treated

791 with or without Talazoparib (10  $\mu$ M for 72 hrs). Chromatin-bound fractions were isolated and  
792 were probed using the indicated antibodies. Histone H3 was used as the loading control. Bottom,  
793 the graph shows the quantification of the levels of PARP1 trapping. Values were presented as  
794 means  $\pm$  SD from three biological replicates. Significance was determined with two-way  
795 ANOVA. \*\*  $p < 0.01$ , \*\*\*  $p < 0.001$ .

796 (F) The extent of DNA damage in HeLa PARP1 KO cells expressing WT PARP1 or R138C  
797 PARP1 that were treated with or without Talazoparib (10  $\mu$ M for 72 hrs). Left, whole cell lysates  
798 were probed using the indicated antibodies. Right, the graph shows the quantification of  $\gamma$ H2AX  
799 and pS172 TBK1 levels. Values were presented as means  $\pm$  SD from three biological replicates.  
800 Significance was determined with two-way ANOVA. \*\*  $p < 0.01$ , \*\*\*  $p < 0.001$ .

801 (G) RT-qPCR analyses of type I interferons in HeLa PARP1 KO cells expressing WT or R138C  
802 PARP1 that were treated with or without Talazoparib (10  $\mu$ M for 72 hrs). Values of *Inf- $\alpha$*  and  
803 *Inf- $\beta$*  mRNA levels were presented as means  $\pm$  SEM from three biological replicates.  
804 Significance was determined with two-way ANOVA. \*\*  $p < 0.01$ , \*\*\*  $p < 0.001$ .

805

806

807

808

809

810

811

812

813

814

815

816

817

818

819

820

821

822

823

824 Figure 3-figure supplement 1

825 (A) The levels of PAR signals in HeLa cells treated with the indicated PARPi (10  $\mu$ M for 72 hrs).  
826 Top, whole cell lysates were probed using the indicated antibodies. Bottom, the graph shows the  
827 quantification of PAR levels. GAPDH was used as the loading control. Values were presented as  
828 means  $\pm$  SD from three biological replicates. Significance was determined with one-way  
829 ANOVA. \*\*\*  $p < 0.001$ .

830 (B) RT-qPCR analyses of cGAS-STING target gene expression in HeLa cells treated with  
831 Talazoparib or Rucaparib (10  $\mu$ M for 72 hrs). Values of type I interferons, cytokines, and ISGs  
832 mRNA levels were presented as means  $\pm$  SEM from three biological replicates. Significance was  
833 determined with one-way ANOVA. \*  $p < 0.05$ , \*\*  $p < 0.01$ , \*\*\*  $p < 0.001$ , \*\*\*\*  $p < 0.0001$ .

834 (C) RT-qPCR analyses of cGAS-STING target gene expression in HeLa PARP1 KO cells  
835 expressing PARP1 WT or R138C that were treated with or without Talazoparib (10  $\mu$ M for 72  
836 hrs). Values of cytokines and ISGs mRNA levels were presented as means  $\pm$  SEM from three  
837 biological replicates. Significance was determined with one-way ANOVA. \*\*  $p < 0.01$ , \*\*\*  $p <$   
838 0.001.

839

840

841

842

843

844

845

846

847

848

849

850 Figure 4. PARP1 degraders abolish PARP1-trapping induced innate immune signaling.

851 (A) The level of PARP1 in HeLa cells treated with either Rucaparib or iRucaparib-AP6 (10  $\mu$ M  
852 for 72 hrs). Whole cell lysates were probed using the indicated antibodies. GAPDH was used as  
853 the loading control.

854 (B) The level of trapped PARP1 in HeLa cells treated with either Rucaparib or iRucaparib-AP6  
855 (10  $\mu$ M for 72 hrs). Top, chromatin-bound fractions were isolated and were probed using the  
856 indicated antibodies. Histone H3 was used as the loading control. Bottom, the graph shows the  
857 quantification of the level of PARP1 trapping. Values were presented as means  $\pm$  SD from three  
858 biological replicates. Significance was determined with one-way ANOVA. \*\*\*  $p < 0.001$ .

859 (C) The extent of DNA damage in HeLa cells treated with either Rucaparib or iRucaparib-AP6  
860 (10  $\mu$ M for 72 hrs). Top, whole cell lysates were probed using the indicated antibodies. Bottom,  
861 the graph shows the quantification of  $\gamma$ H2AX levels. Values were presented as means  $\pm$  SD from  
862 three biological replicates. Significance was determined with one-way ANOVA. \*\*\*  $p < 0.001$ .

863 (D) The level of pS172 TBK1 in HeLa cells treated with either Rucaparib or iRucaparib-AP6 (10  
864  $\mu$ M for 72 hrs). Top, whole cell lysates were probed using the indicated antibodies. Bottom, the  
865 graph shows the quantification of pS172 TBK1 levels. Values were presented as means  $\pm$  SD  
866 from three biological replicates. Significance was determined with one-way ANOVA. \*\*  $p < 0.01$ .

867 (E) RT-qPCR analyses of the cGAS-STING target gene expression in HeLa cells treated with  
868 either Rucaparib or iRucaparib-AP6 (10  $\mu$ M for 72 hrs). Values of type I interferons, cytokines,  
869 and ISGs mRNA levels were presented as means  $\pm$  SEM from three biological replicates.

870 Significance was determined with one-way ANOVA. \*  $p < 0.05$ , \*\*  $p < 0.01$ , \*\*\*  $p < 0.001$ , \*\*\*\*  $p <$   
871 0.0001.

872 (F) The model of the activation of innate immune response via PARPi-induced PARP1 trapping.

873

**Figure 1. PARPi induces the innate immune response via the cGAS-STING pathway**

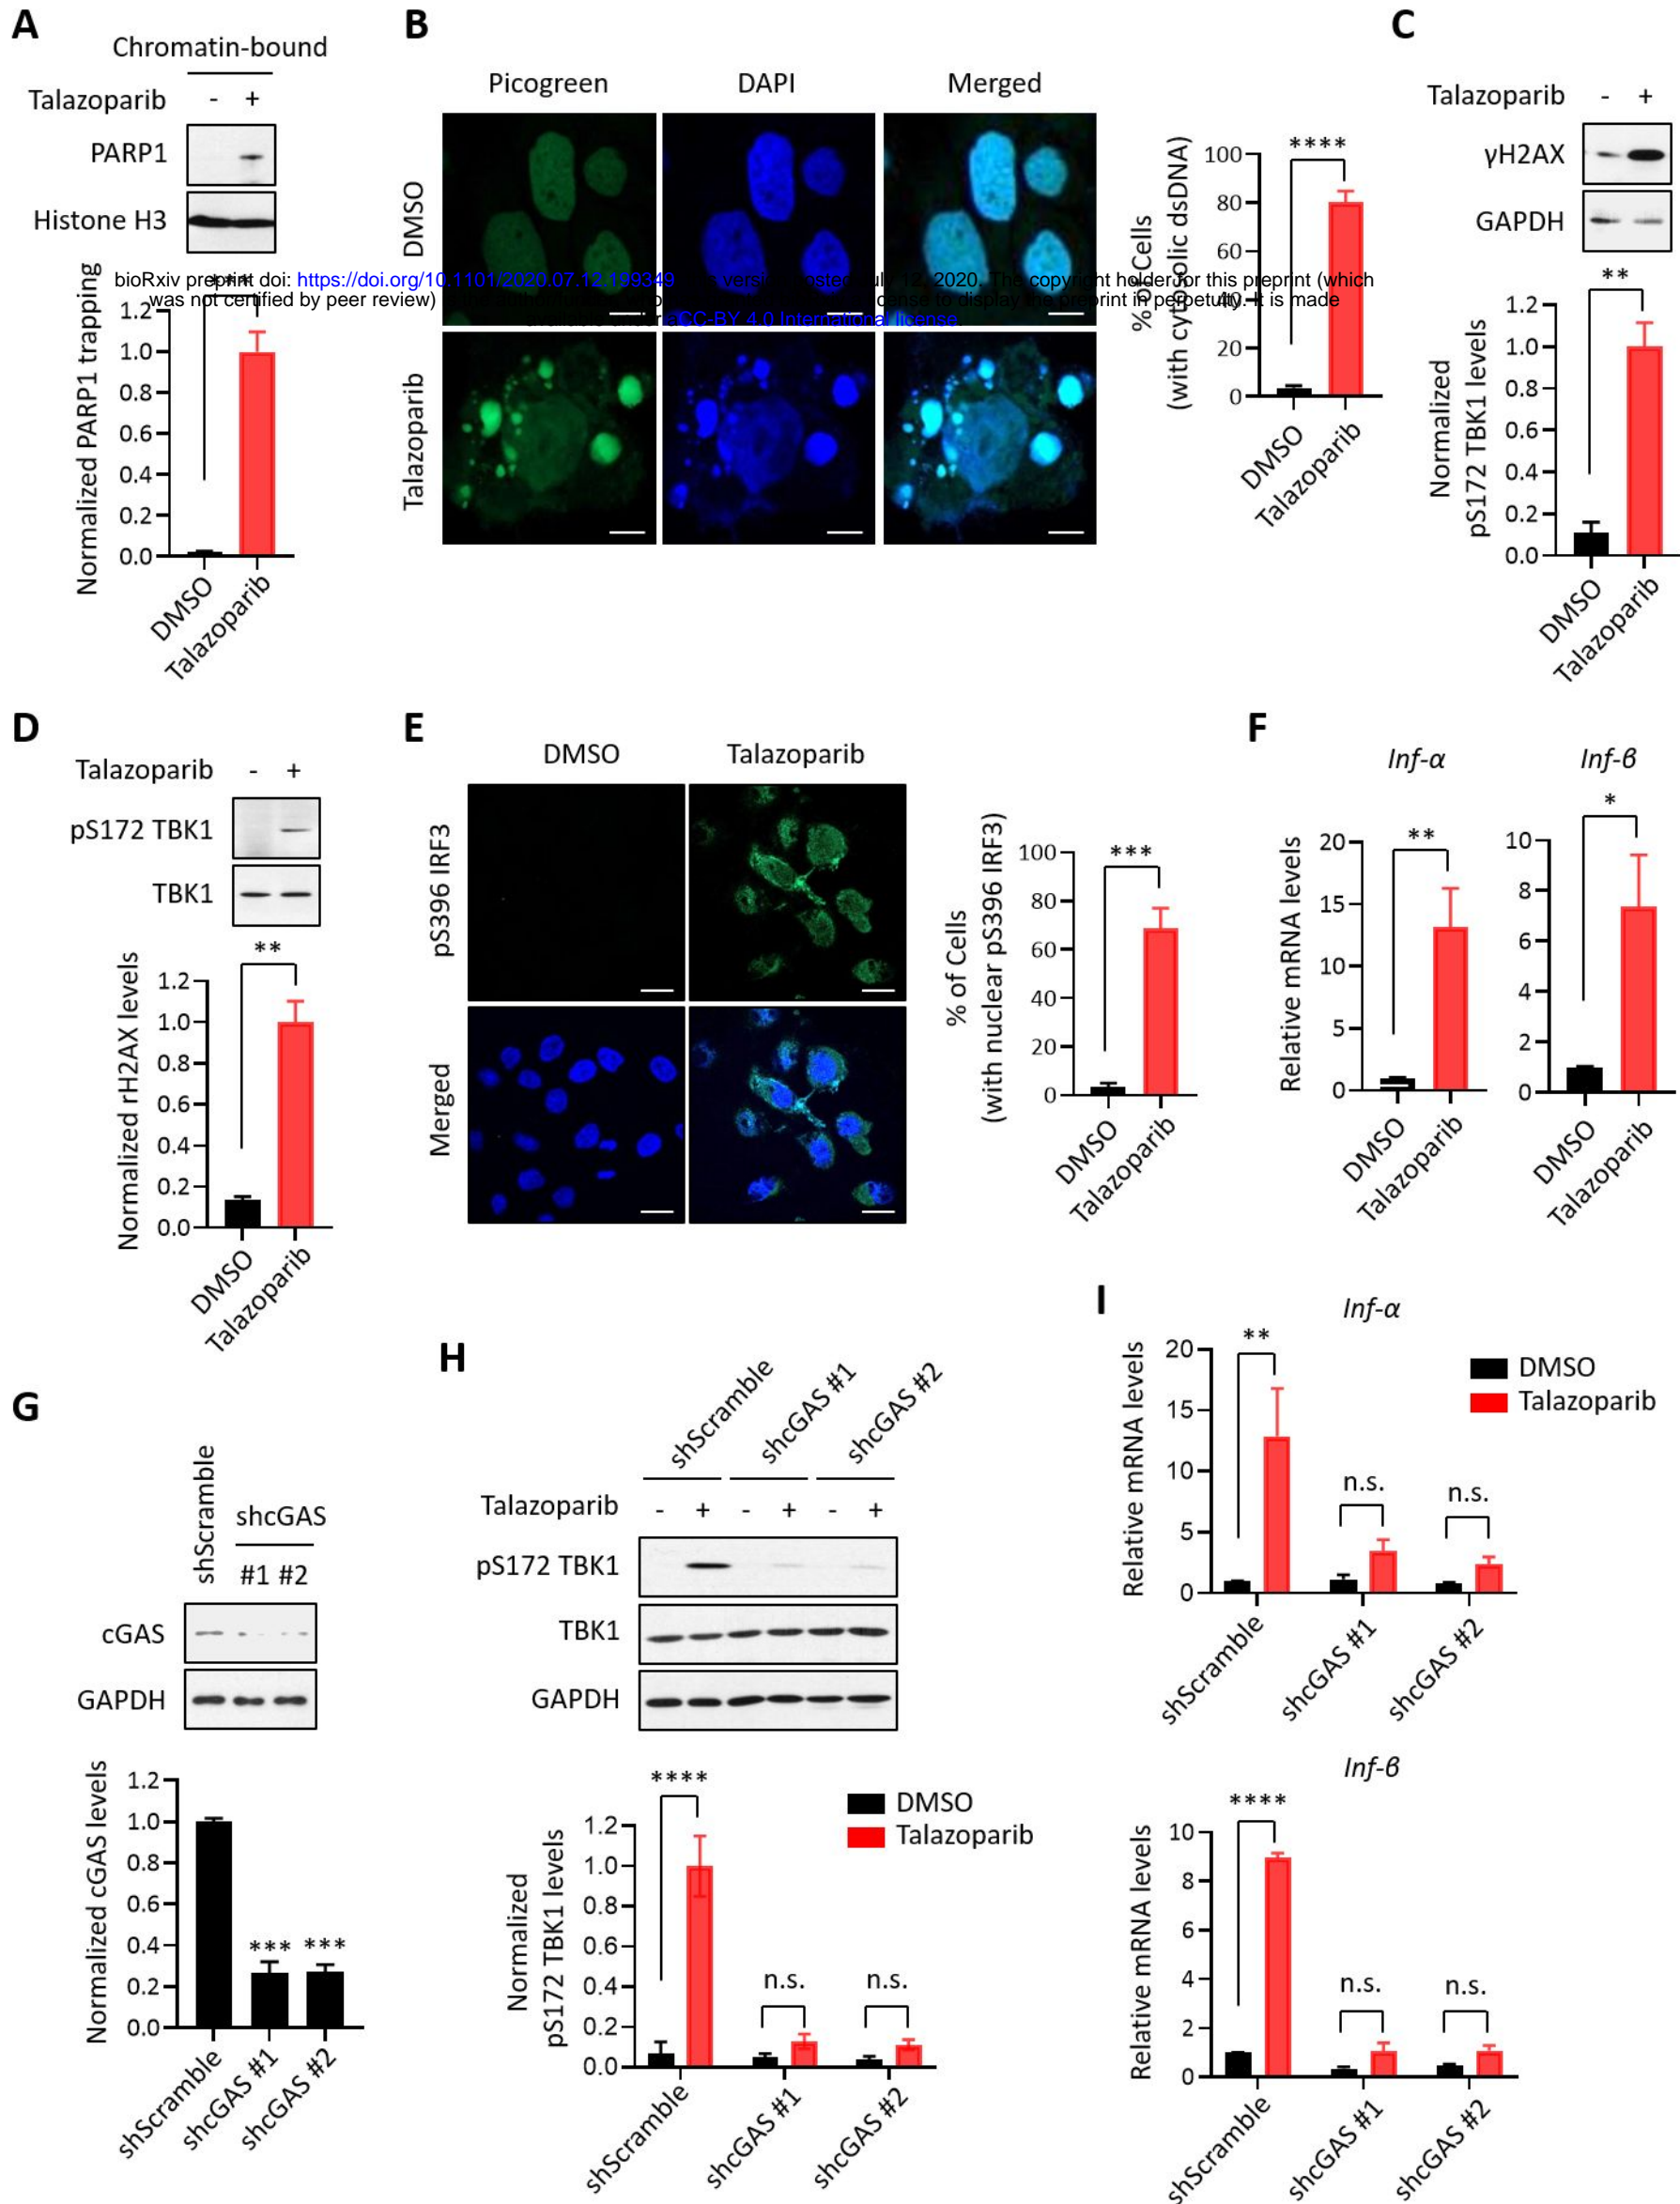



**Figure 1 - figure supplement 1.**

**A**

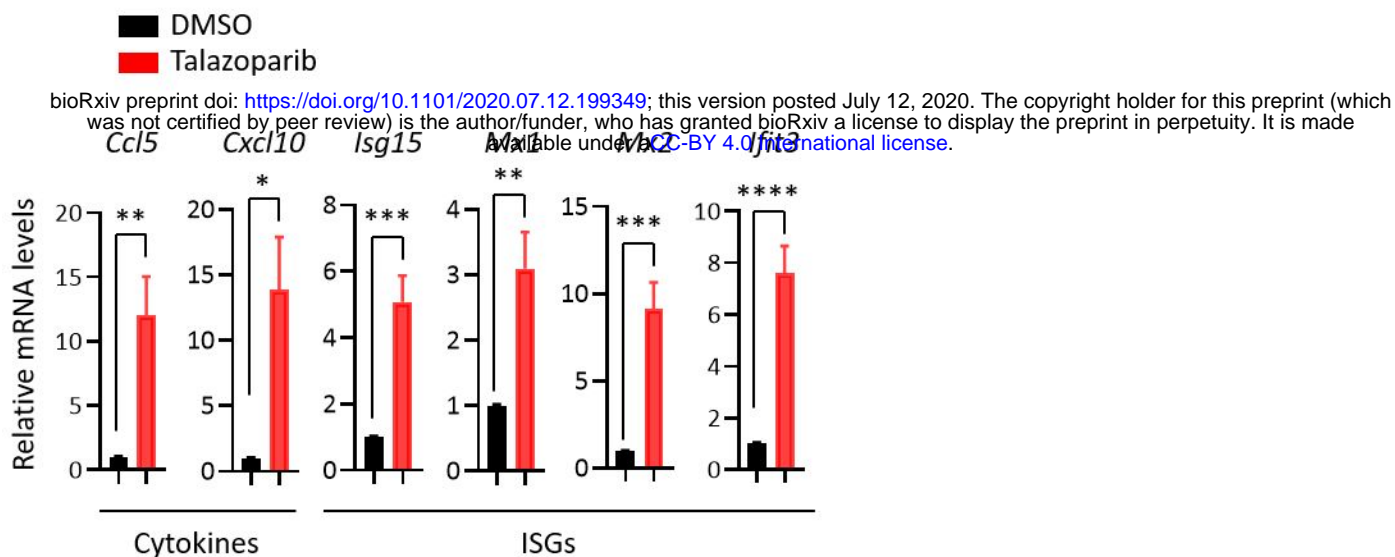

**B**

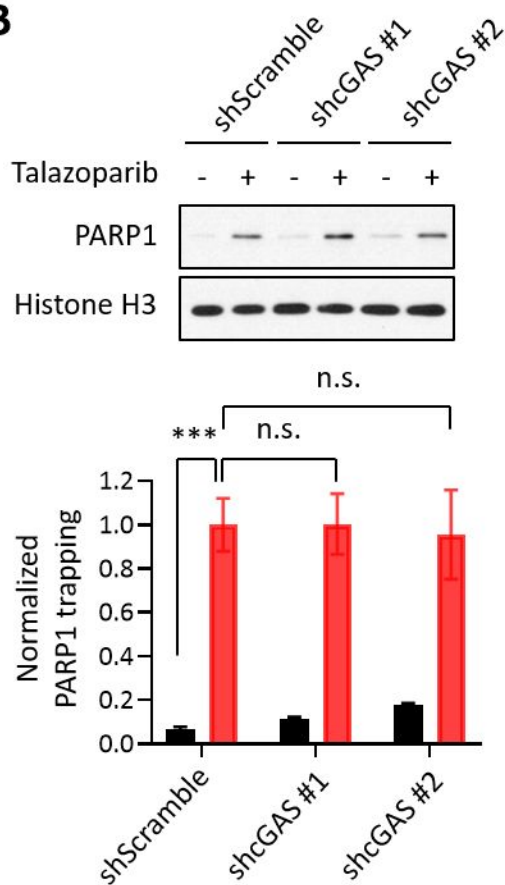

**C**

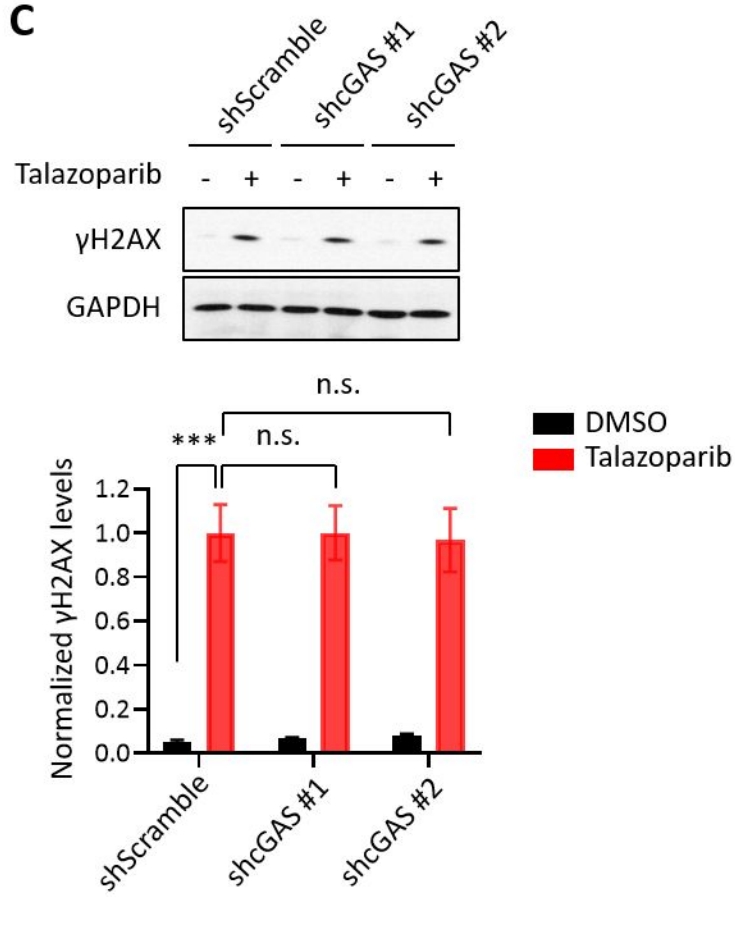

**D**

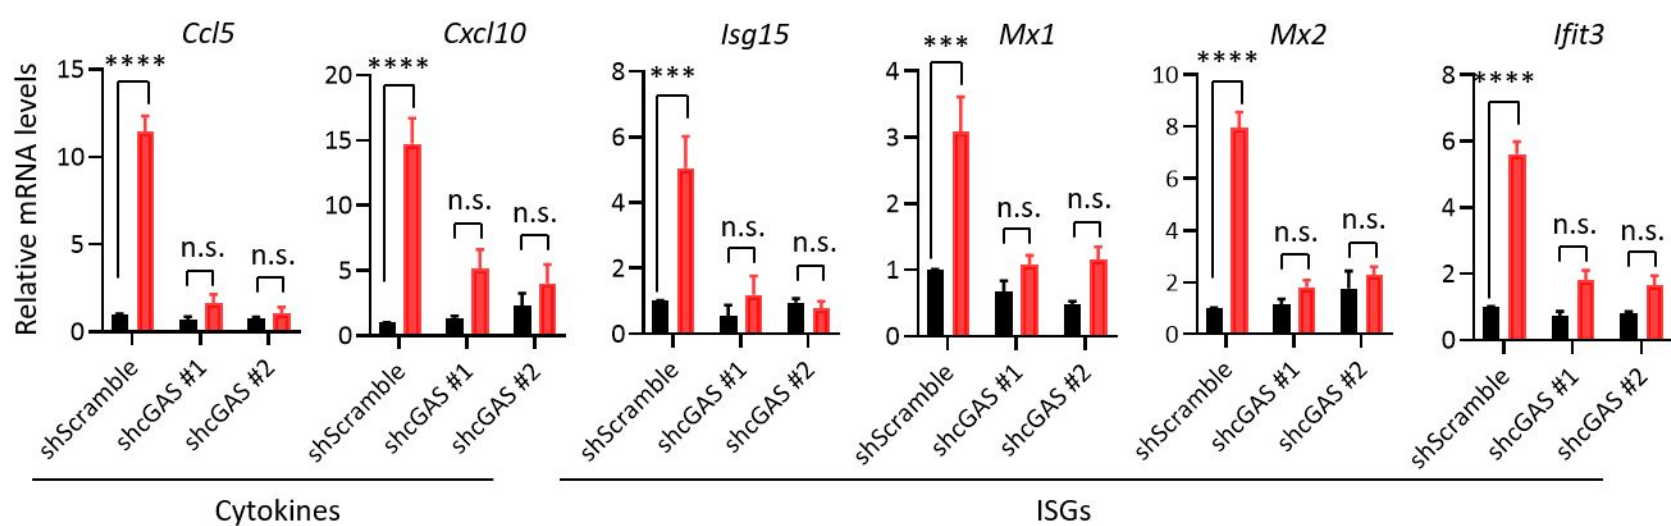

Figure 1 - figure supplement 1 – continued.

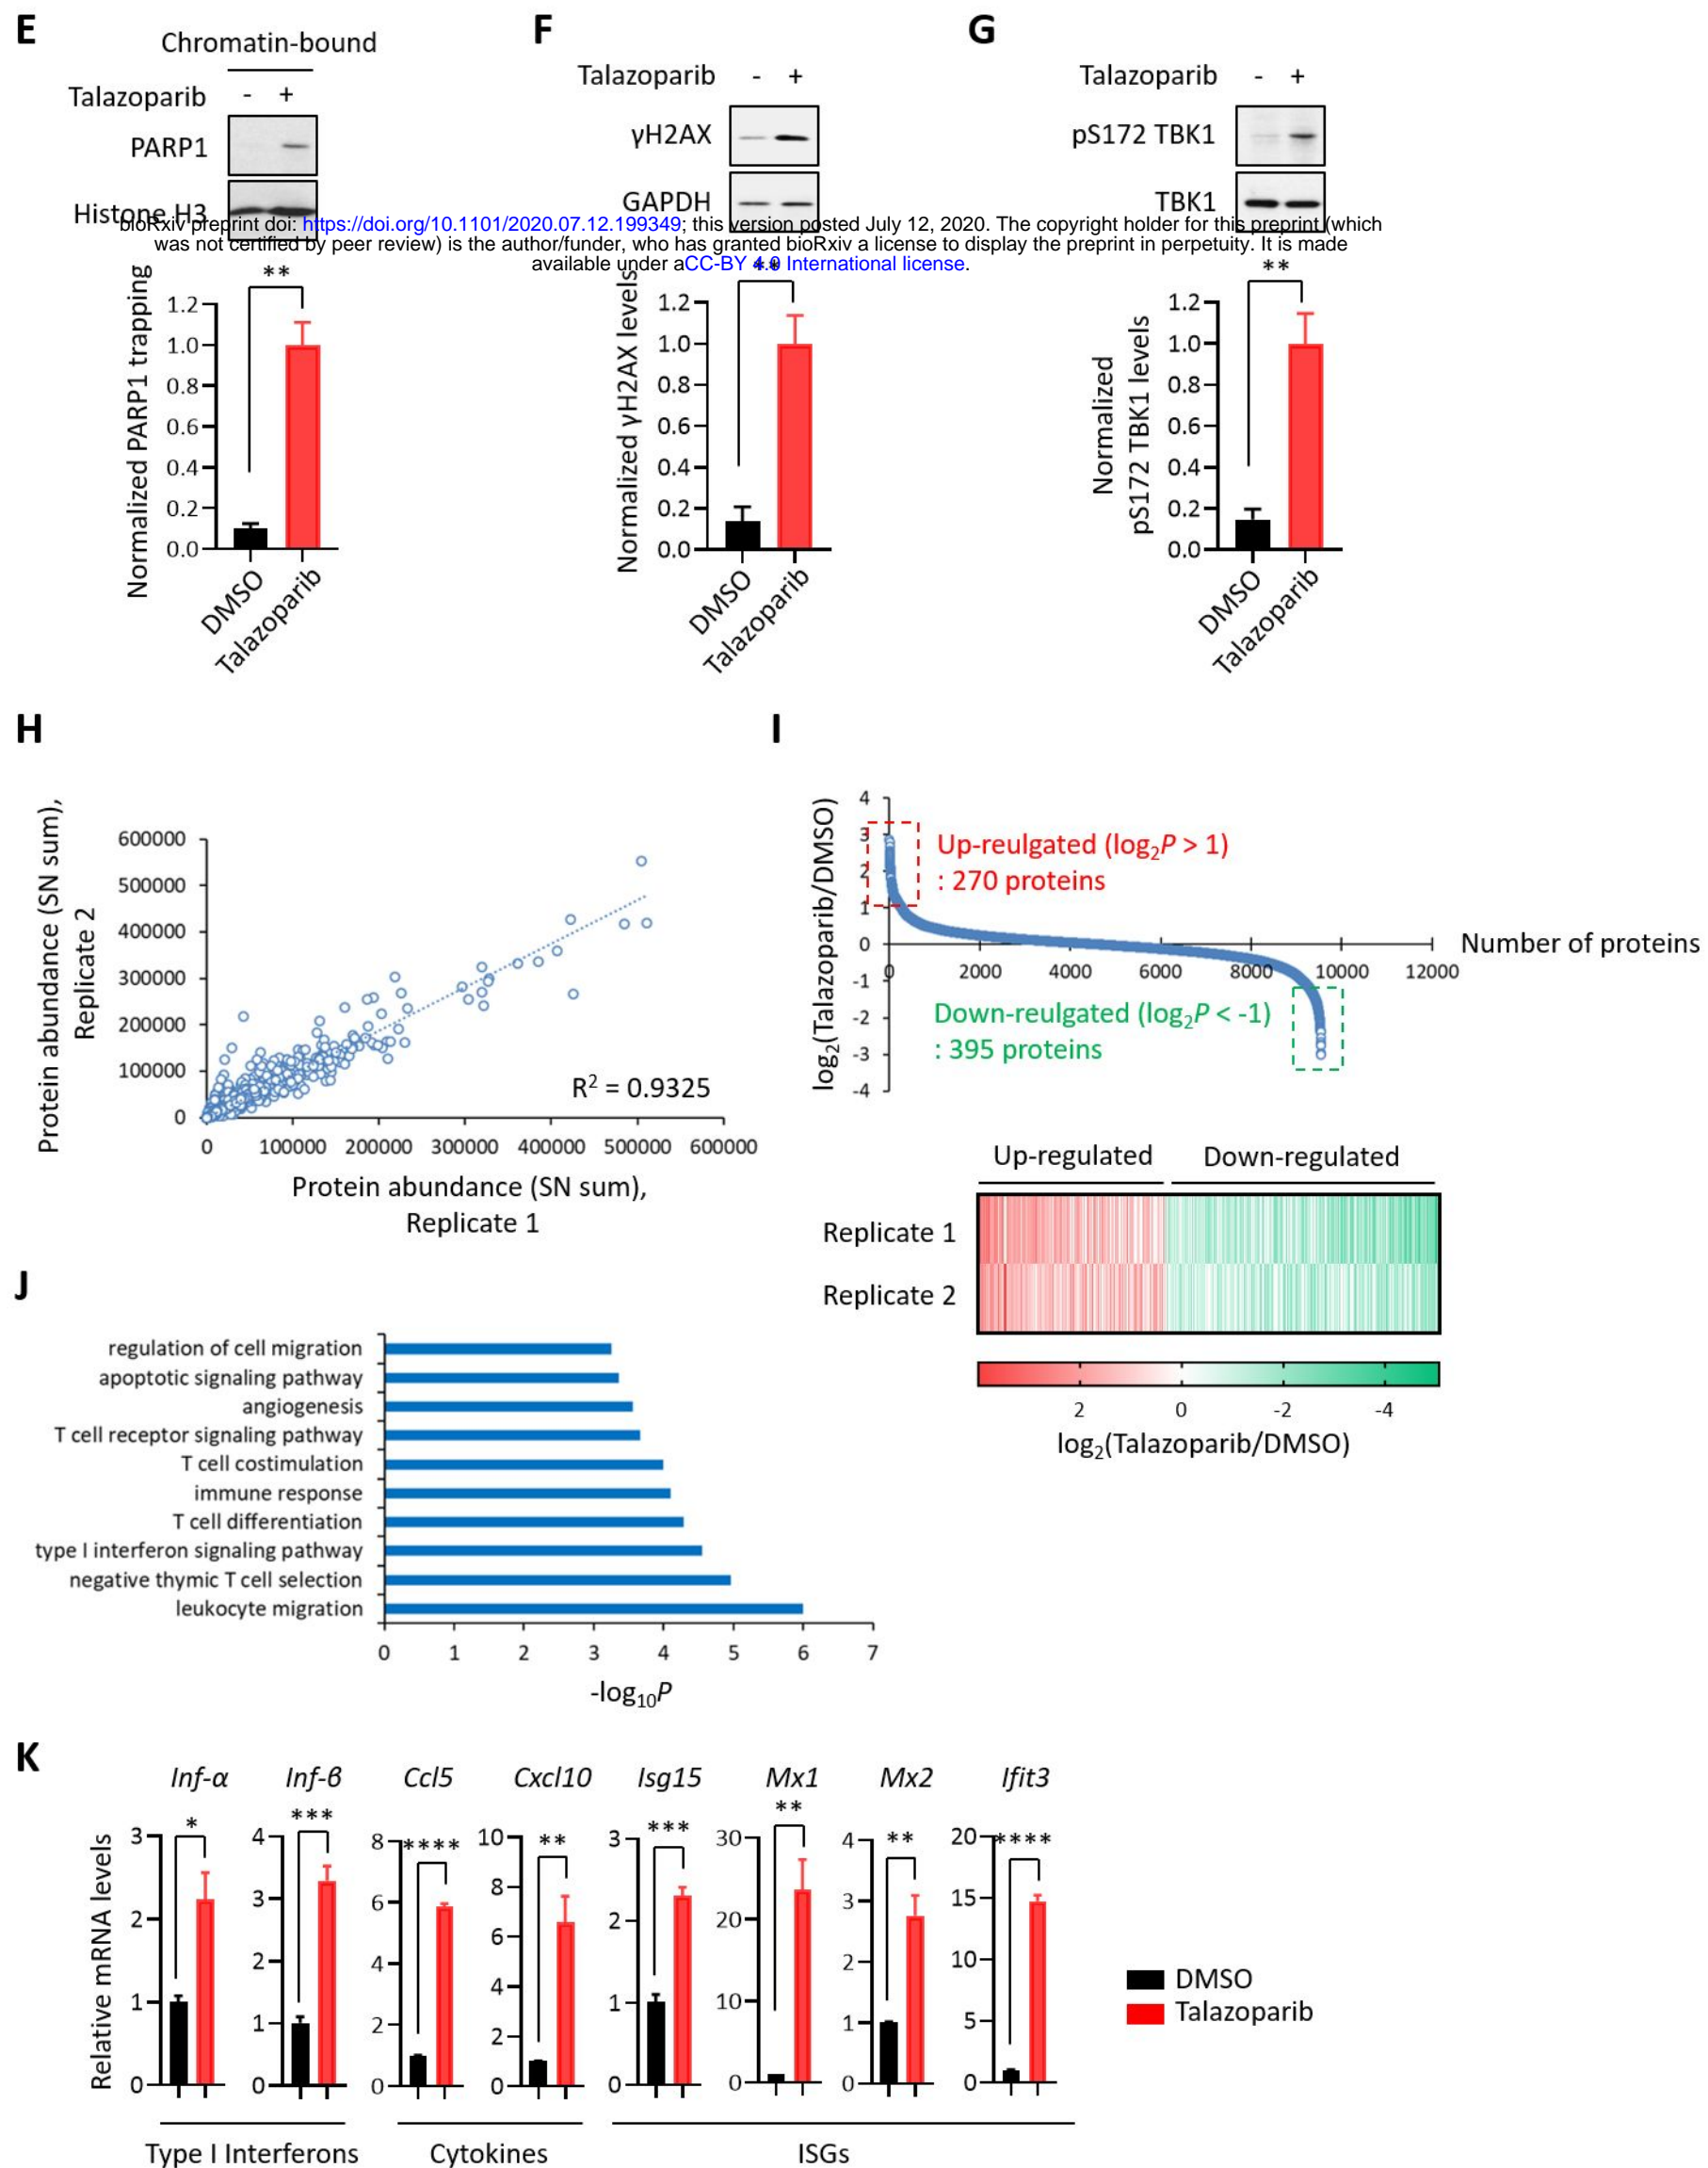

**Figure 2. The PARP1 protein is required for PARPi-induced innate immune signaling**

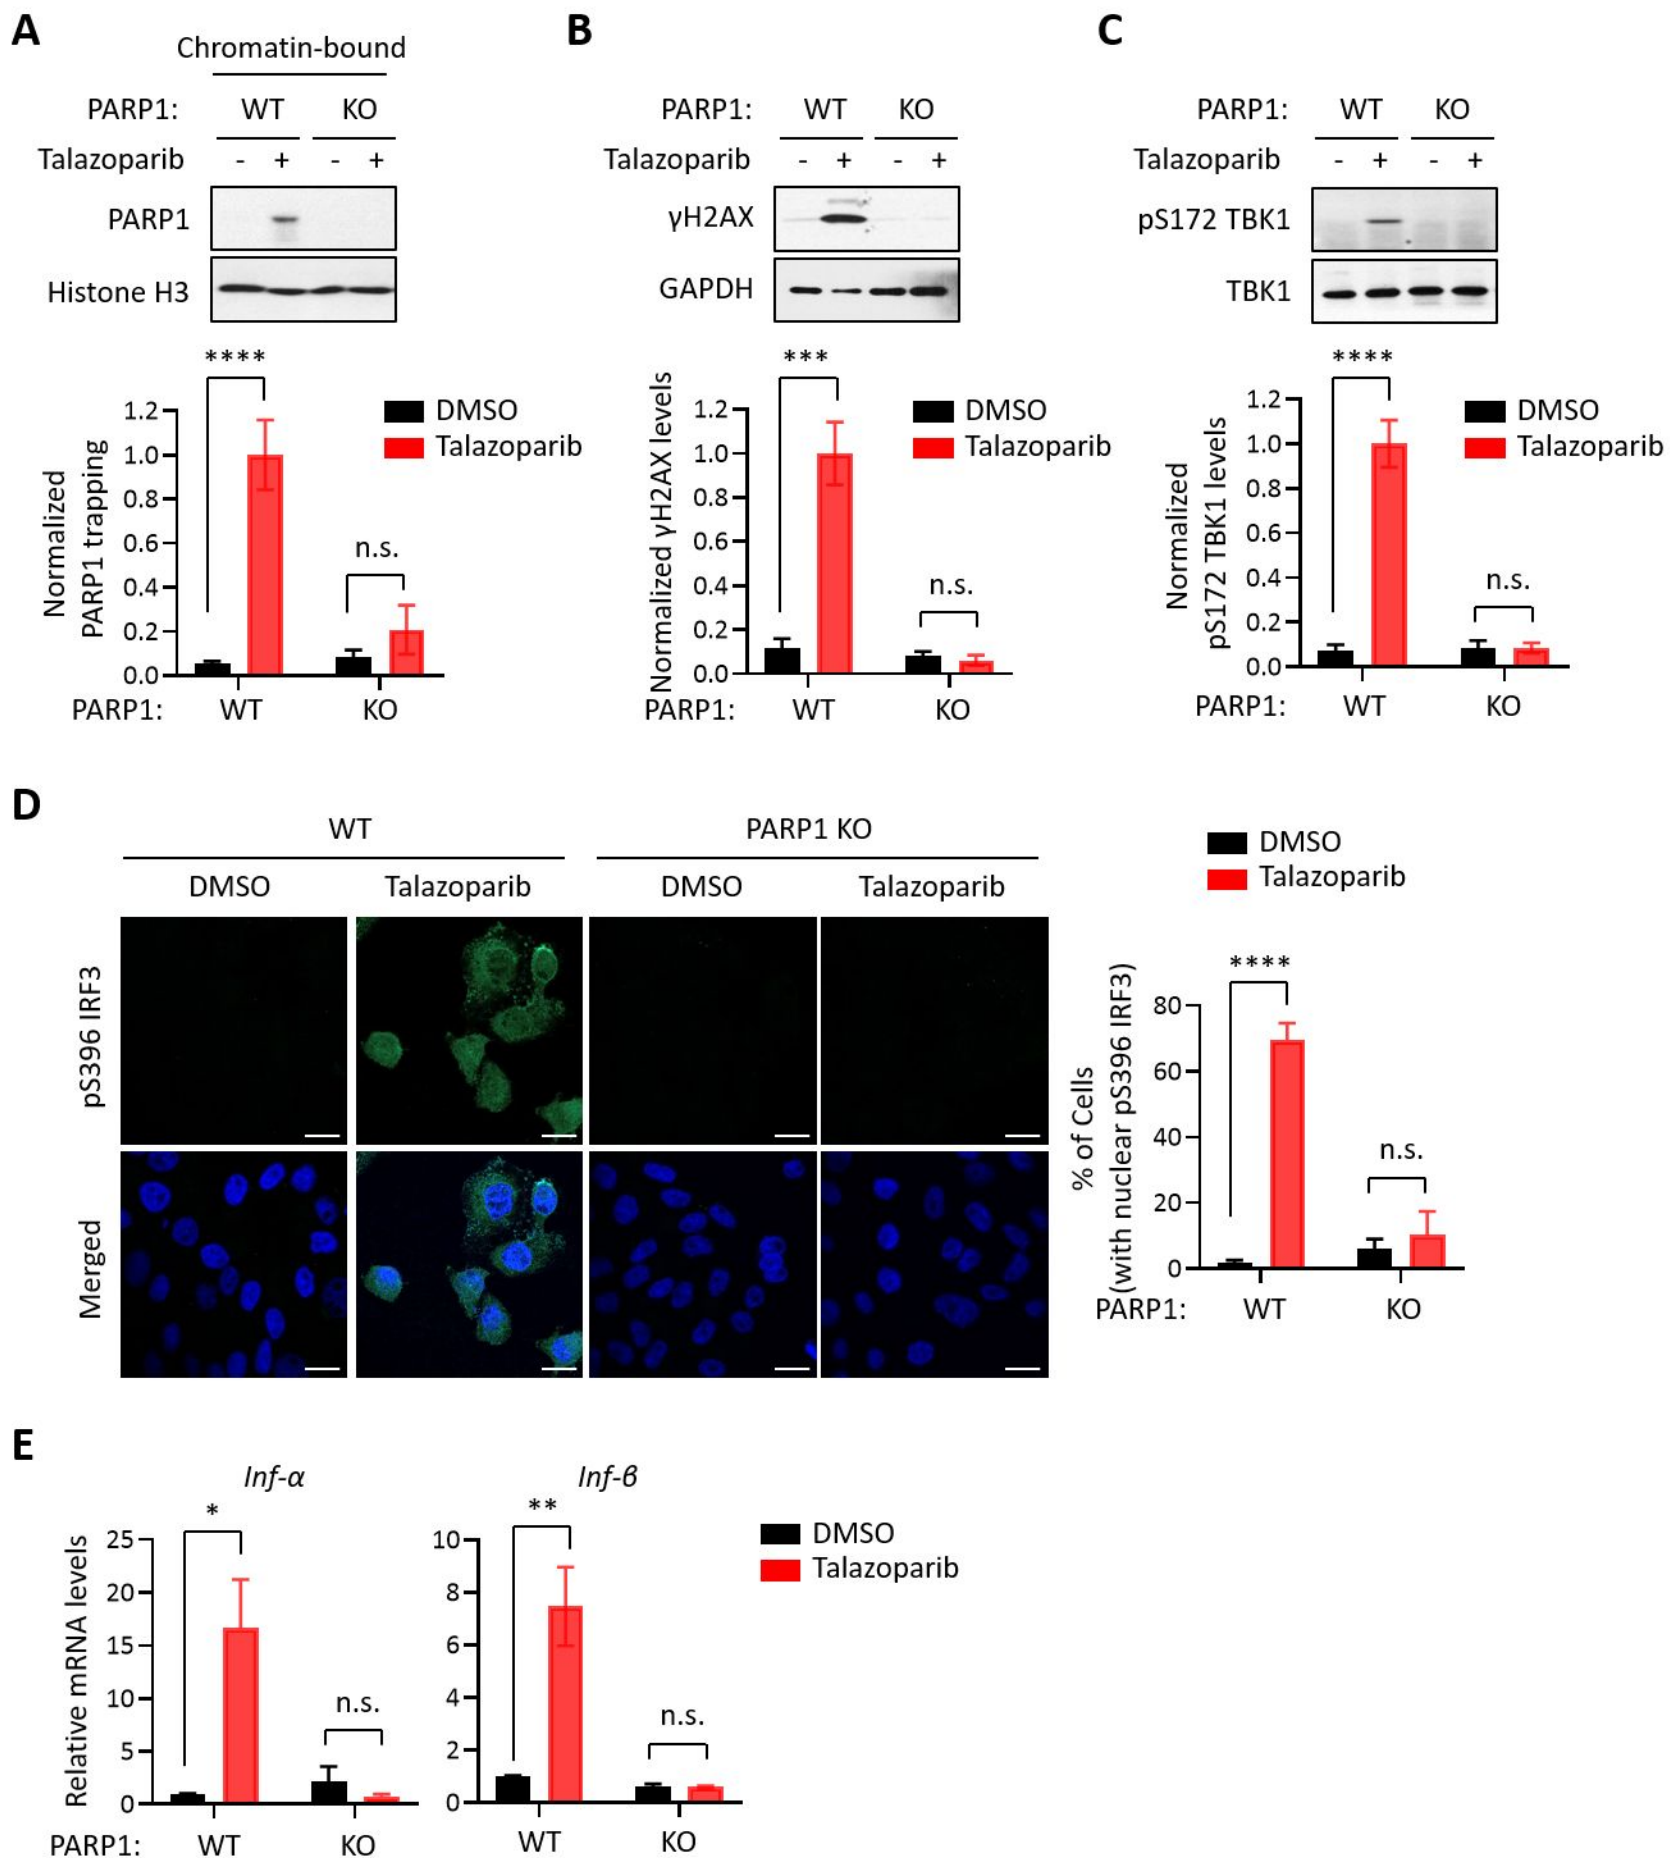

Figure 2 - figure supplement 1.

A

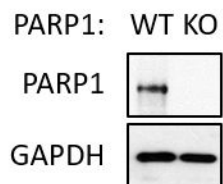

B

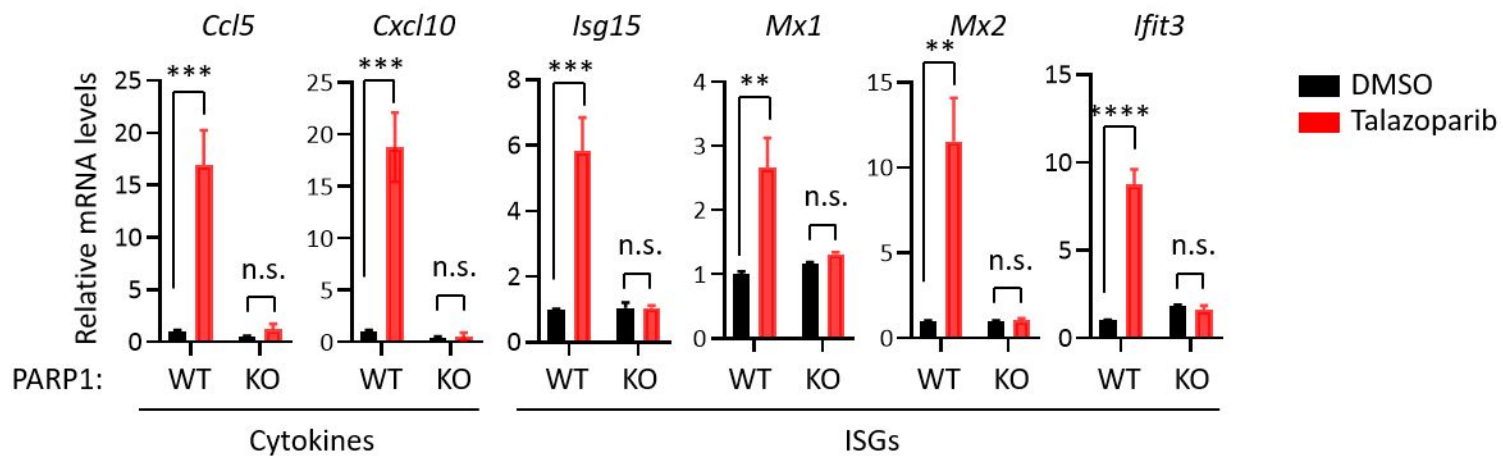

# Figure 3. PARP1 trapping is the major contributor of PARPi-induced innate immune signaling

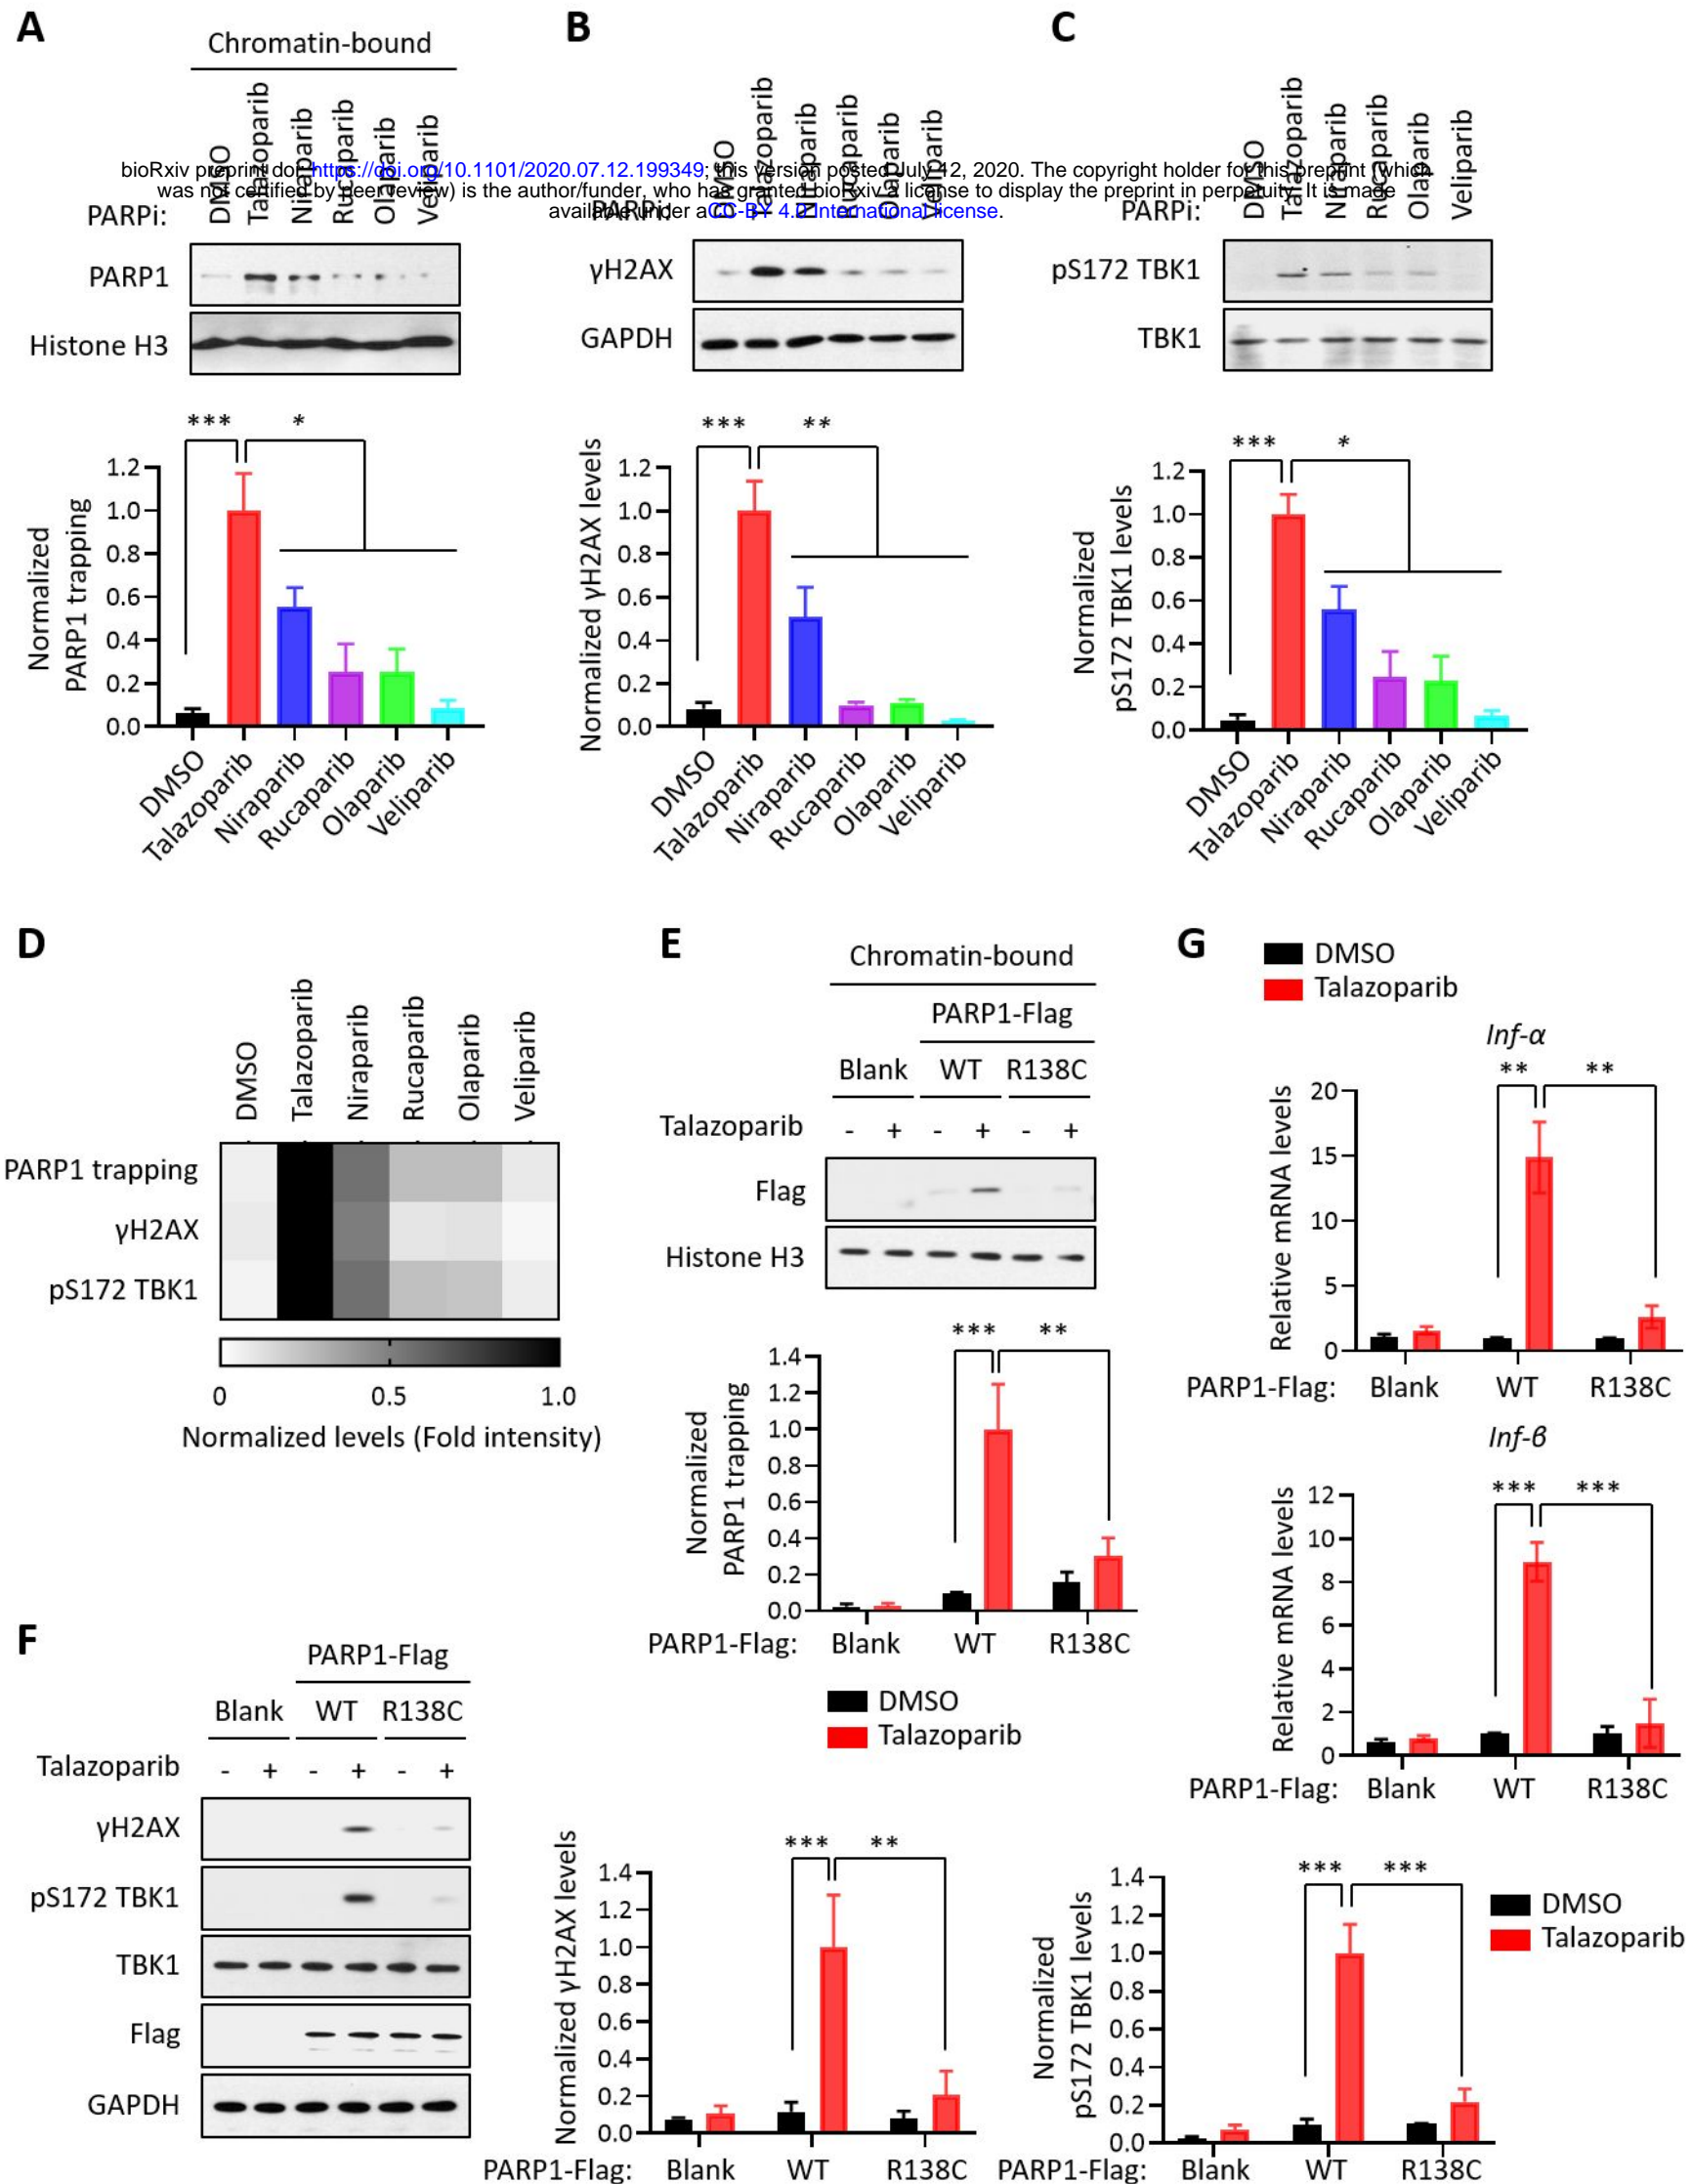

**Figure 3 - figure supplement 1.**

**A**

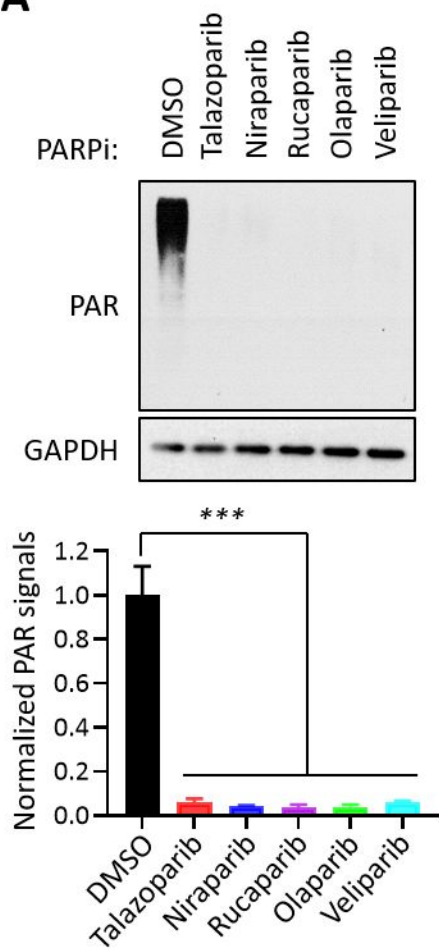

**B**

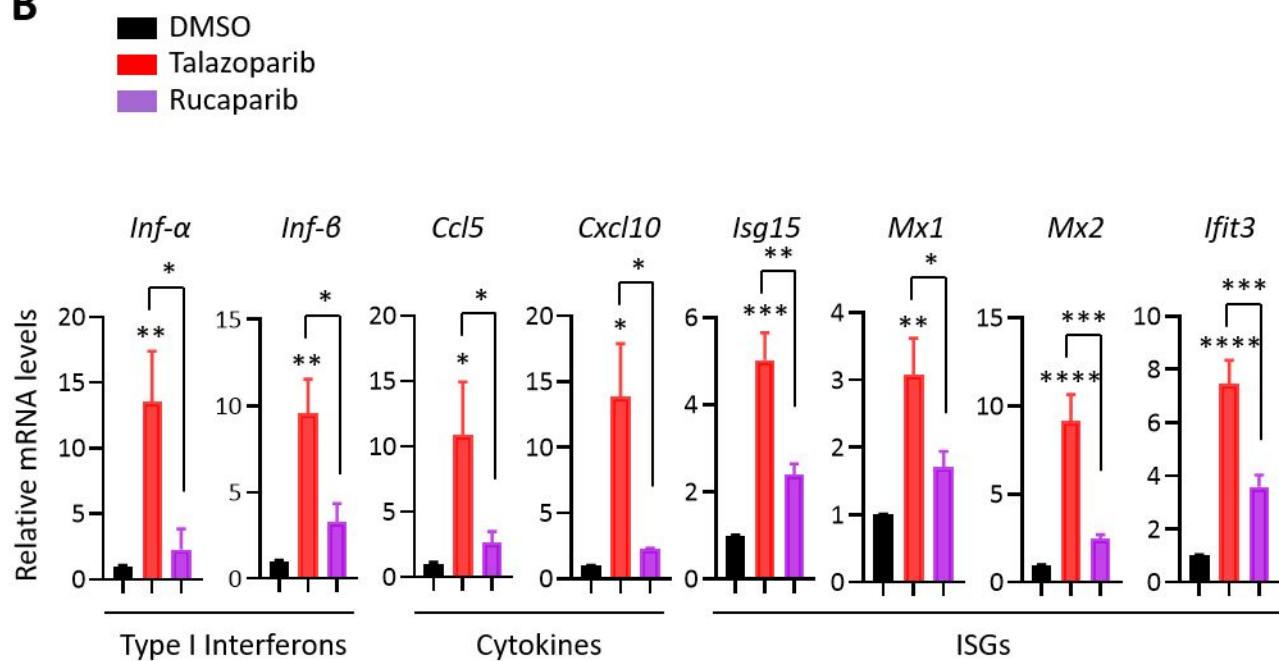

**C**

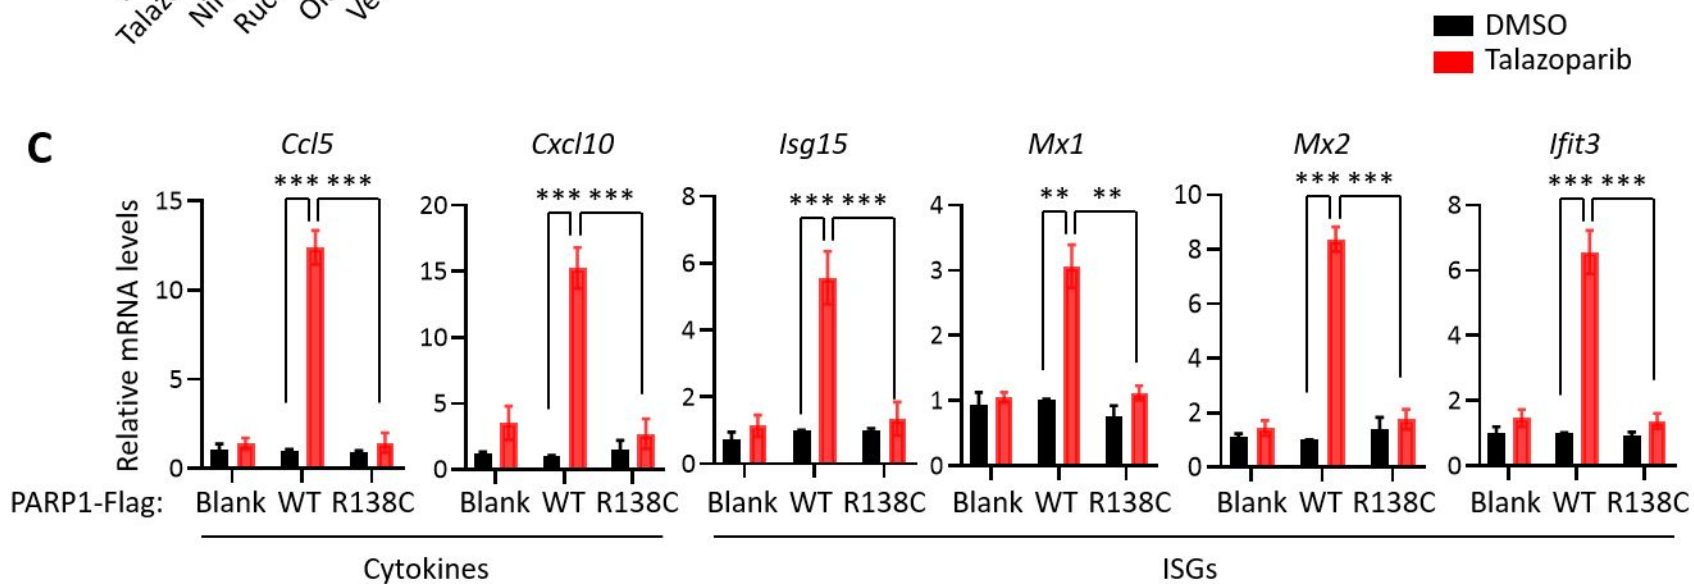

# Figure 4. PARP1 degraders abolish PARP1-trapping induced innate immune signaling

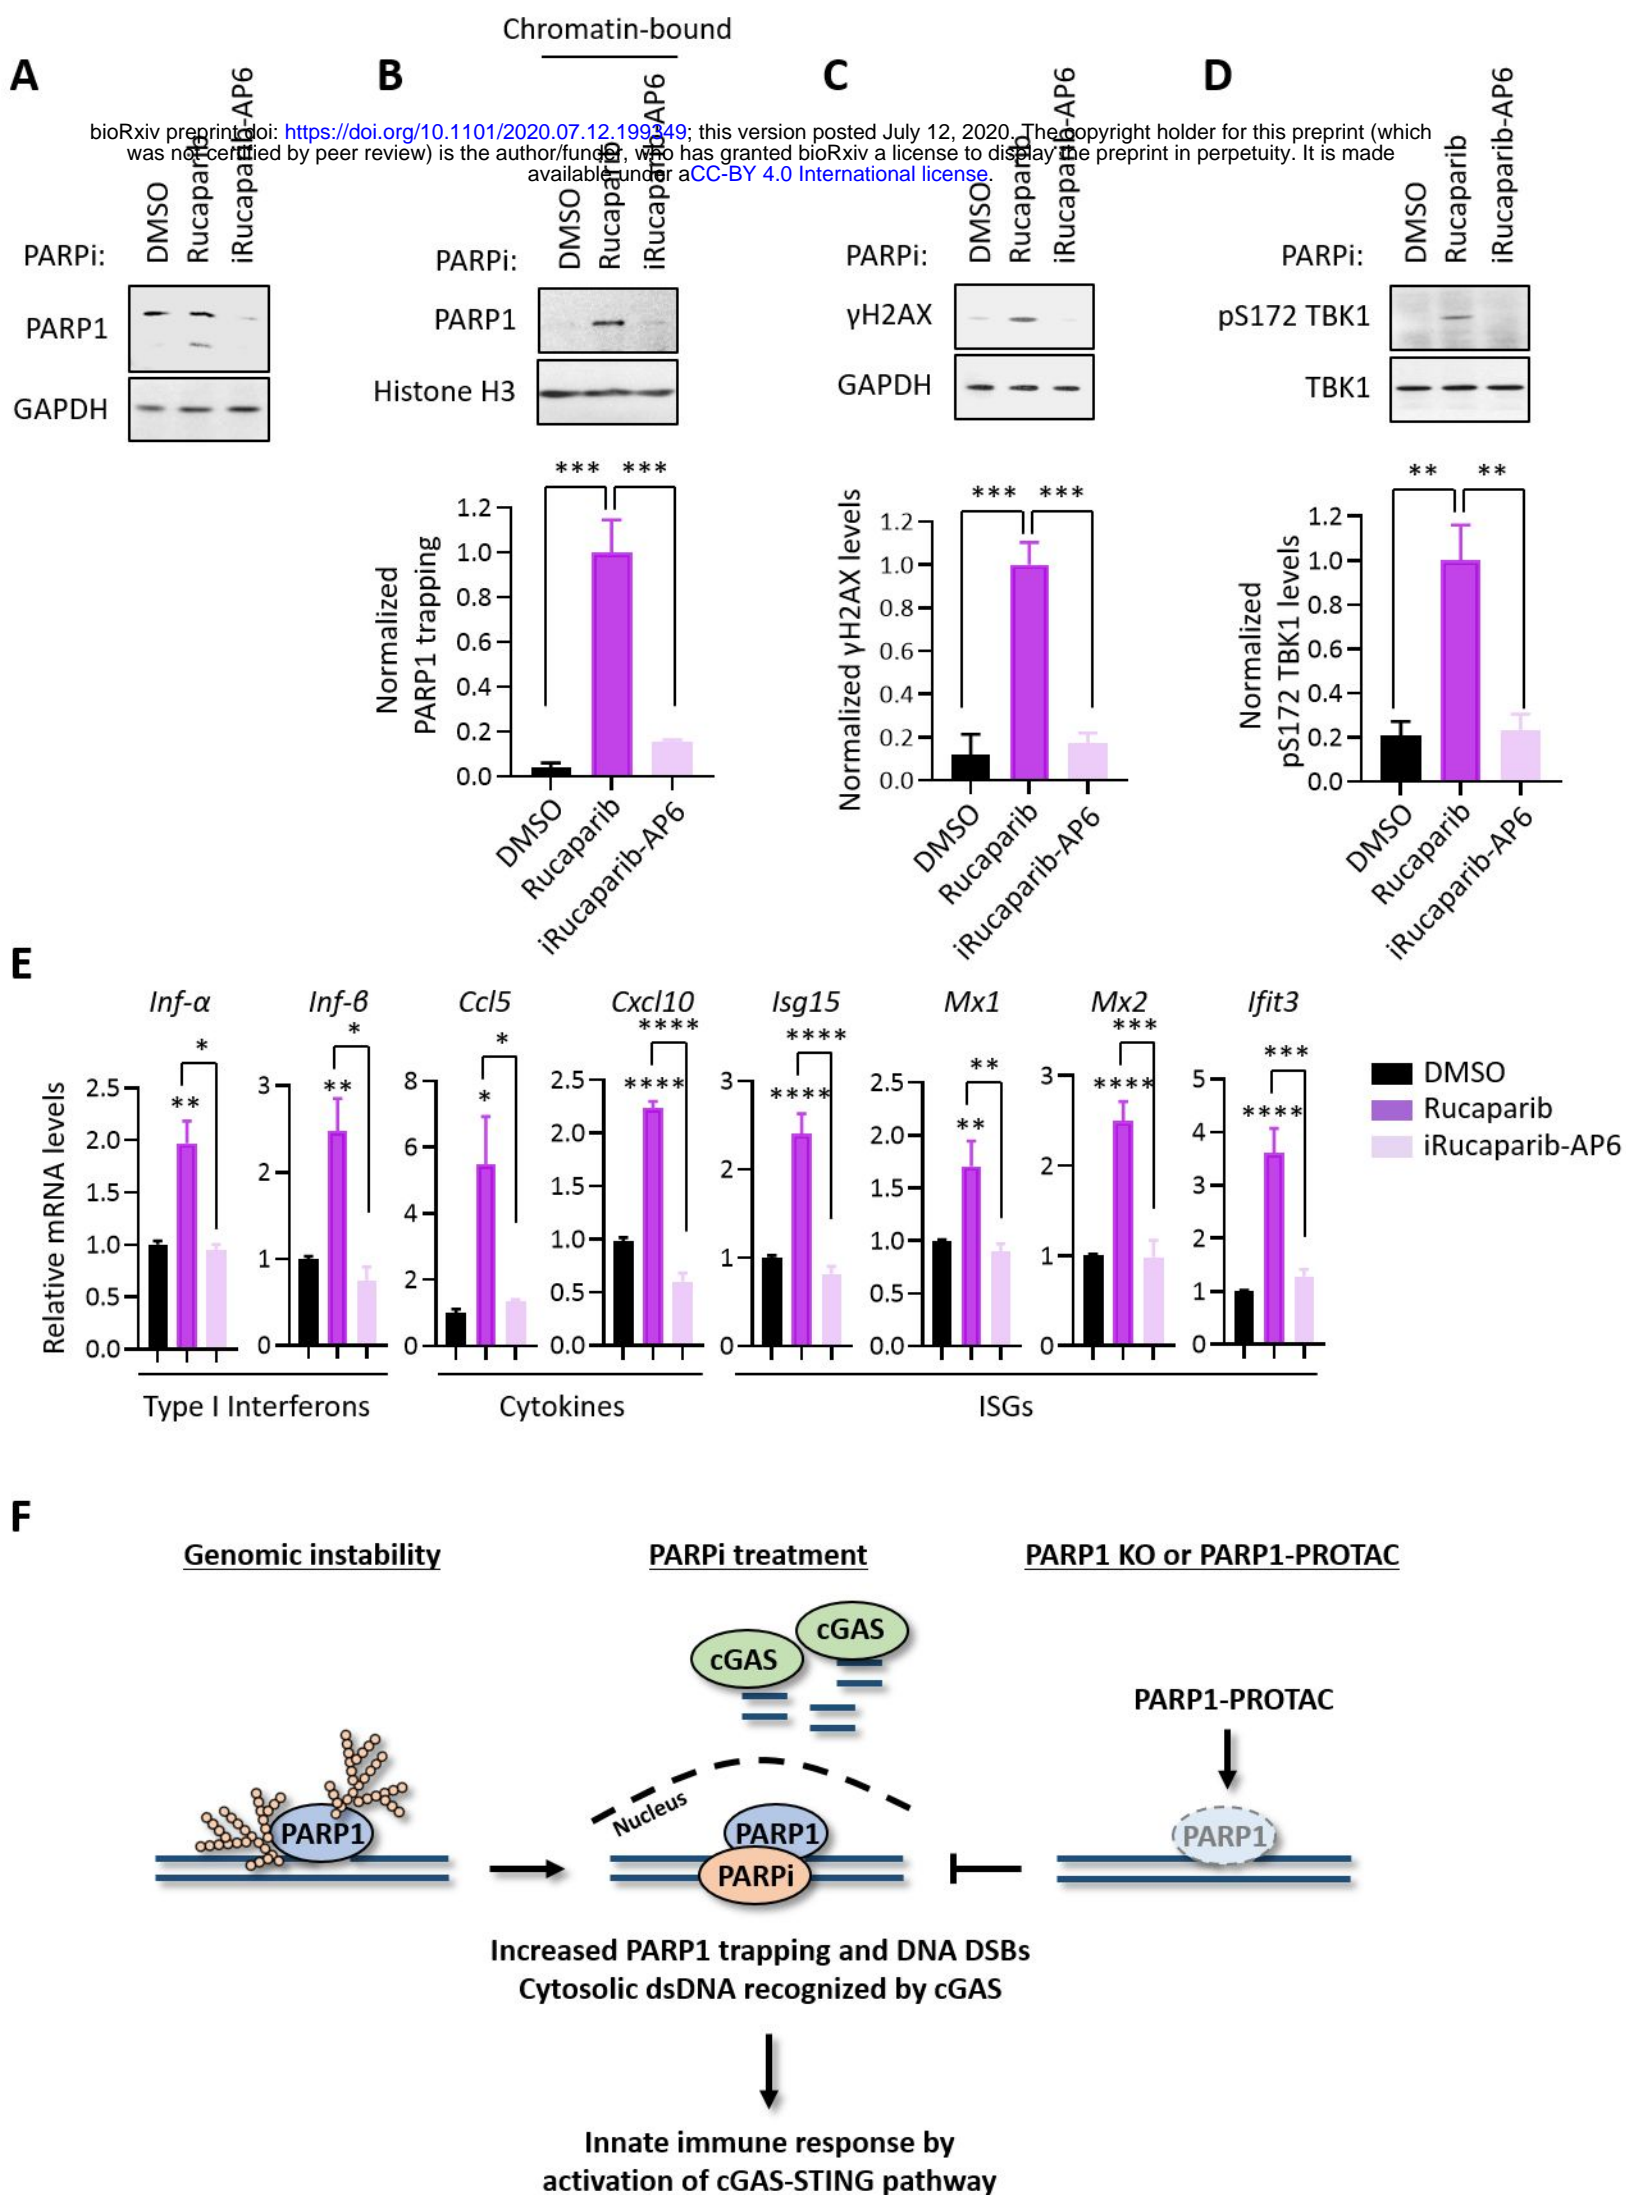

Source: https://www.biorxiv.org/content/10.1101/2020.07.12.199349v1.full.pdf
